# Supplementary material for: 2018 ESC/EACTS Guidelines on myocardial revascularization
Source: Oxford University Press journal article supplement (doi:10.1093/ejcts/ezy289), 2018-08-27
Supplement: ezy289_supplementary_data.doc [file ezy289_supplementary_data.doc]

3B2 EDGAR HTML from OP-EHEA180405-WEB 1..14


**2018 ESC/EACTS Guidelines on
myocardial revascularization - Supplementary Data**

 

**The Task Force on myocardial
revascularization of the European Society of Cardiology (ESC) and European
Association for Cardio-Thoracic Surgery (EACTS)**

**Developed with the special contribution of
the European Association for Percutaneous Cardiovascular Interventions (EAPCI)**

**Authors/Task
Force Members: Franz-Josef Neumann\* (ESC Chairperson) (Germany), Miguel
Sousa-Uva\*****1****(EACTS Chairperson)
(Portugal), Anders Ahlsson****1** **(Sweden), Fernando Alfonso (Spain),
Adrian P. Banning (UK), Umberto Benedetto****1** **(UK), Robert A.
Byrne (Germany), Jean-Philippe Collet (France), Volkmar Falk****1** **(Germany), Stuart J.
Head****1** **(The Netherlands),
Peter Jüni (Canada),   
Adnan Kastrati (Germany), Akos Koller (Hungary), Steen D. Kristensen (Denmark),
Josef Niebauer (Austria), Dimitrios J. Richter (Greece), Petar M. Seferovi****ć** **(Serbia), Dirk
Sibbing (Germany), Giulio G. Stefanini (Italy), Stephan Windecker
(Switzerland), Rashmi Yadav****1** **(UK), Michael O. Zembala****1** **(Poland)**

**Document
Reviewers: William Wijns (ESC Review Co-ordinator) (Ireland), David Glineur****1** **(EACTS Review
Co-ordinator) (Canada), Victor Aboyans (France), Stephan Achenbach (Germany),
Stefan Agewall (Norway), Felicita Andreotti (Italy), Emanuele Barbato (Italy),
Andreas Baumbach (UK), James Brophy (Canada), Héctor Bueno (Spain), Patrick A.
Calvert (UK), Davide Capodanno (Italy), Piroze M. Davierwala****1**

\*
Corresponding authors. Franz-Josef Neumann, Department of
Cardiology and Angiology II, University Heart Centre Freiburg-Bad Krozingen,
Suedring 15, 79189 Bad Krozingen, Germany. Tel: þ49 7633 402 2000, Fax:
þ49 7633 402 2009, Email: franz-josef.neumann@universitaets-herzzentrum.de.
Miguel Sousa-Uva, Cardiac Surgery Department, Hospital Santa Cruz, Avenue Prof
Reynaldo dos Santos, 2790-134 Carnaxide, Portugal. Tel: þ 351 210 433 163, Fax:
þ351 214241388; Email: migueluva@gmail.com.

**ESC Committee for
Practice Guidelines (CPG), EACTS Clinical Guidelines Committee, and National
Cardiac Societies document reviewers: listed in the Appendix.**

**1****Representing
the European Association for Cardio-Thoracic Surgery (EACTS).**

**ESC entities having
participated in the development of this document:**

**Associations**:
Acute Cardiovascular Care Association (ACCA), European Association of
Preventive Cardiology (EAPC), European Association of Cardiovascular Imaging
(EACVI), European Association of Percutaneous Cardiovascular Interventions
(EAPCI), European Heart Rhythm Association (EHRA), Heart Failure Association
(HFA).

**Councils**:
Council on Cardiovascular Nursing and Allied Professions, Council for
Cardiology Practice, Council on Cardiovascular Primary Care, Council on Stroke,
Council on Valvular Heart Disease

**Working
Groups**: Aorta and Peripheral Vascular Diseases, Cardiovascular
Pharmacotherapy, Coronary Pathophysiology and Microcirculation, Thrombosis.

**Disclaimer.** The
ESC Guidelines represent the views of the ESC and were produced after careful
consideration of the scientific and medical knowledge and the evidence
available at the time of their dating. The ESC is not responsible in the event
of any contradiction, discrepancy and/or ambiguity between the ESC Guidelines
and any other official recommendations or guidelines issued by the relevant
public health authorities, in particular in relation to good use of health care
or therapeutic strategies. Health professionals are encouraged to take the ESC
Guidelines fully into account when exercising their clinical judgment as well
as in the determination and the implementation of preventive, diagnostic or
therapeutic medical strategies. However, the ESC Guidelines do not override in
any way whatsoever the individual responsibility of health professionals to
make appropriate and accurate decisions in consideration of each patient's
health condition and in consultation with that patient and the patient's
caregiver where appropriate and/or necessary. Nor do the ESC Guidelines exempt
health professionals from taking careful and full consideration of the relevant
official updated recommendations or guidelines issued by the competent public
health authorities in order to manage each patient's case in light of the
scientifically accepted data pursuant to their respective ethical and
professional obligations. It is also the health professional's responsibility
to verify the applicable rules and regulations relating to drugs and medical
devices at the time of prescription.

© The European Society
of Cardiology 2018.
All rights reserved. For permissions please email:
journals.permissions@oxfordjournals.org

 

(Germany), Victoria Delgado (The
Netherlands), Dariusz Dudek (Poland), Nick Freemantle1 (UK), Christian Funck-Brentano (France), Oliver Gaemperli
(Switzerland), Stephan Gielen (Germany), Martine Gilard (France), Bulent
Gorenek (Turkey), Joerg Haasenritter (Germany), Michael Haude (Germany), Borja Ibanez (Spain), Bernard
Iung (France), Anders
Jeppsson1 (Sweden), Demosthenes Katritsis
(Greece), Juhani Knuuti (Finland), Philippe Kolh1 (Belgium), Adelino Leite-Moreira1 (Portugal), Lars H. Lund (Sweden), Francesco Maisano (Switzerland), Julinda Mehilli (Germany), Bernhard Metzler (Austria), Gilles Montalescot (France), Domenico Pagano1 (UK), Anna Sonia Petronio (Italy), Massimo Francesco
Piepoli (Italy), Bogdan A. Popescu (Romania), Rafael Sa´daba1 (Spain), Evgeny Shlyakhto (Russia), Sigmund Silber (Germany), Iain A. Simpson (UK), David Sparv (Sweden),
Giuseppe Tavilla1 (The Netherlands),
Holger Thiele (Germany), Petr Tousek (Czech
Republic), Eric Van Belle (France), Pascal Vranckx (Belgium), Adam Witkowski (Poland), Jose Luis Zamorano
(Spain), Marco Rofﬁ (ESC CPG
Supervisor) (Switzerland)

**The disclosure
forms of all experts involved in the development of these Guidelines are
available on the ESC website www. escardio. org/ guidelines**

**Keywords**

Acute coronary syndromes•Antithrombotic therapy•Bare-metal stents•Coronary artery bypass grafting•Coronary artery disease•Drug-eluting stents•Guidelines•Heart
Team•Myocardial infarction•Myocardial ischaemia•Myocardial revascularization•Medical therapy•Percutaneous
coronary intervention•Recommendation•Revascularization•Risk stratification•Stents•Stable angina•Stable coronary artery disease•ST-segment elevation myocardial infarction•SYNTAX score

**Table of contents**

**1. Supplementary tables and text. . . . . . . . . . . . . . . . . . . . . . . . . . . . .
. . . . . . . . . . . . . . . . . . . . . . . . . . . . . . . . 3**

 

Supplementary
Table 1.
Revascularization vs. medical therapy: angina, exercise time, and number of
medications at early and late follow-up . . . . . . . . . . . . . . . . . . . .
. . . . . . . . . . . . . . . . . . . . 3

Supplementary
Table 2.
Revascularization vs. medical therapy . . . . . . . . . . . . . . . . . . . . .
. . . . . . . . . . . . . . . . . . . 4

Supplementary
Table 3.
Percutaneous vs. surgical revascularization . . . . . . . . . . . . . . . . . .
. . . . . . . . . . . . . . . . . . . 6

Supplementary
Table 4. Scoring
systems used in conjunction with myocardial revascularization . . . . .  . . . . . . . . . . . . 7

Supplementary
Table 5.
Randomized trials on revascularization in diabetic patients . . . . . . . . . . .. . . . . . . . . . . . . . . . . 8

Supplementary
Table 6.
CE-approved new-generation drug-eluting stents recommended for clinical use
based on randomized trials with a primary clinical endpoint (in alphabetical
order) . . . . . . . . . . . . . . . . . . . . . . . . . . . . . . . . 9

Supplementary
Table 7.
Overview of CE-marked bioresorbable scaffolds . . . . . . . . . . . . . .
.  . . . . . . . . . . . . . . . . . . 10

Supplementary Table 8 CE
approved drug-coated balloons (in alphabetical order) . . . . . . . . . . . . .
. . . . . . . . . . . 11

Supplementary
Table 9. Quality
indicators for coronary artery bypass grafting . . . . . . . . . . . . . . . .
. . . . . . . . . . . 11

Supplementary
Table 10. Quality
Indicators for percutaneous coronary interventon . . . . . . . . . . . . . . .
. . . . . . . . . 12

Supplementary
Table 11.
Antithrombotic drugs dose adjustment in patients with chronic kidney disease .  . . . . . .
. . . 13

Supplement to chapter 7:
Revascularization in ST-segment elevation myocardial infarction.
. . . . . . . . . . . . . . . . . . . . 14

*Studies on the revascularization strategy in
patients presenting with ST-elevation myocardial infarction and multivessel
disease. . . . . . . . . . . . . . . . . . . . . . . . . . . . . . . . . . . .
. . . 14*

*Revascularization strategy in patients with
myocardial infarction and cardiogenic shock. . . . ..
. . . . . . . . . . . . . . . . . . 14*

Supplement to chapter 10:
Revascularization in patients with chronic kidney disease.
. . . .  . . . . . . . . . . . . . . . .
. 14

*Prevention of contrast-induced nephropathy. .
. . . . . . . . . . . . . . 14*

Supplement to chapter 11:
Revascularization in patients requiring valve interventions.
. . . .. . . . . . . . . . . . . . . . . 15

*Surgical repair of secondary mitral
regurgitation in patients undergoing coronary artery bypass grafting. . .. . .
. . . . . 15*

Supplement to chapter 16:
Procedural aspects of percutaneous coronary intervention. . . . . . . . . . . .
. . . . . . . . . . 16

*Studies on the Absorb bioresorbable vascular scaffold. . . . . . . 16*

Supplement to chapter 17:
Antithrombotic treatments. . . . . . . . . . . . . . .
. . . . . . . . . . . . . . . . . . . . . . . . . . . . . . 16

*TRITON-TIMI 38: NSTEMI and STEMI patients. . . . . . . . . . . . 16*

*PLATO: NSTEMI and STEMI patients. . . . . . .
. . . . . . . . . . . . . . . 16*

*Studies on cangrelor
for percutaneous coronary intervention.* *17*

*Studies on bivalirudin vs. unfractionated heparin. . . . . . . . . . . . 17*

*Revascularization in patients with renal failure. . . . . . . . . . . . . . 18*

*Monitoring of antiplatelet drugs (platelet
function testing and genotyping). . . . .  . . . . . . . . . . . . . . . . . . . . . . .
. . . 18*

 

**2. References for Material in Supplementary Appendix** **. . . . .
. . . . . . . . . . . . . . . . . 19**

**1. Supplementary tables and text**

 

**Supplementary  Table****1** **Revascularization vs. medical therapy:
angina, exercise time,
and number of medications at early and late follow-up**

 

|  |  |  |  |  |  |  |  |
| --- | --- | --- | --- | --- | --- | --- | --- |
| **Study** | **Angina** | | **Exercise time** | | **Number of medications** | |  |
| ***Early*** | ***Late*** | ***Early*** | ***Late*** | ***Early*** | ***Late*** |  |
| ACME1 | 64 vs. 46%\* free of angina at 6 months | 62 vs. 47%\* free of angina at 3 years | 11.2 vs. 9.5 min\* exercise time duration at 6 months | 10.0 vs. 8.5 min\* exercise time duration at 3 years | 30 vs. 50% on beta-  blocker\*, 35 vs. 71% on CCB\*, and 24 vs. 50% on nitrate\* at 6 months | 28 vs. 39% on  beta-blocker, 47 vs. 72% on CCB\*, and 24 vs. 52% on nitrate\* at 3 years | © ESC 2018 |
| RITA-22 | 19.4 vs. 35.9%\* at 3 months | 15.0 vs. 21.4%\* at 5 years | 37 s in favour of PCI\* at 3 months | 25 s in favour of PCI\* at 3 years | 37 vs. 57% on >\_2 drugs at 3 months | 31 vs. 45% on >\_2 drugs at 5 years |
| AVERT3 | Improvement in angina 54 vs. 41%\* at 1.5 years | – | – | – | 61 vs. 60% on beta-  blocker, 44 vs. 49% on CCB, and 50 vs. 60% on nitrate at  1.5 years | – |
| TIME4 | Significant improvement in angina class at 6 months | No differences in angina class at 1 year | – | – | Significant reduction of number of drugs at 6 months | Significant reduction of number of drugs at 1 year |
| MASS II5 | 21 (PCI) vs. 12  (CABG) vs. 54%  (MT) free of angina\* at 1 year | 41 (PCI) vs. 36  (CABG) vs. 57%  (MT) free of angina\* at 10 years | – | – | – | – |
| SWISSI II6 | – | – | Max workload at bicycle ergometry 169 vs. 148 W\* at  4 years | Max workload at bicycle ergometry 173 vs. 136 W\* at  10 years | 49 vs. 86% on beta-  blocker\*, 21 vs. 51% on CCB\*, and 12 vs. 47% on nitrate\* at  4 years | 39 vs. 84% on  beta-blocker\*, 17 vs. 32% on CCB, and 4 vs. 45% on nitrate\* at  10 years |
| COURAGE7 | 56 vs. 47%\* free of angina at 6 months | 59 vs. 56% free of angina at 3 years | – | – | 85 vs. 89% on beta-  blocker, 40 vs. 49% on CCB\*, and 53 vs. 67% on nitrate\* at 1 year | 85 vs. 86% on  beta-blocker, 42 vs. 52% on CCB\*, and 40 vs. 57% on nitrate\* at 5 years |
| FAME II8 | 91 vs. 80%\* free of angina (CCS II–IV) at 6 months | 94 vs. 88%\* free of angina (CCS II–IV) at 2 years | – | – | 81% vs. 82 on beta- blocker and 25 vs. 30% on CCB at 6 months | 77 vs. 80% on beta-blocker and 30 vs. 32% on CCB\* at 2 years |
| ORBITA9 | 51% vs. 45%  improvement by at least 1 CCS class at 6 weeks | – | Difference in increment of 16.6 s in favour of PCI at 6 weeks | – | 2.9 anginal medications in both arms at 6 weeks | – |

 

\**P* <0.05.

 

CABG = coronary artery
bypass grafting; CCB = calcium-channel blocker; CCS = Canadian Cardiovascular Society; MT = medical therapy;
PCI = percutaneous coronary intervention; W = watts.

  

Supplementary Table 2 **Revascularization
vs. medical therapy: study, baseline characteristics, primary endpoint, maximum
clinical follow-up**

 

|  |  |  |  |  |  |  |  |  |  |  |  |  |  |  |  |
| --- | --- | --- | --- | --- | --- | --- | --- | --- | --- | --- | --- | --- | --- | --- | --- |
| **Year of publication** | **Study** | ***n*** | **Baseline characteristics** | | | | | **Primary endpoint** | | | **Maximum clinical follow-up** | | | | © ESC 2018 |
| **Age (y)** | **Women (****%****)** | **Diabetes (****%****)** | **MVD** **(****%****)** | **EF (****%****)** | **Definition** | **Years** | **Results** | **Years** | **Death** | **MI** | **Revascularization** |
| **CABG vs. MT** |  |  |  |  |  |  |  |  |  |  |  |  |  |  |
| 1980 | ECSS | 768 | <65b | 0 | – | 100 | >50b | – | – | – | 8 | 11.4 vs. 20.1%\* | – | – |
| 1984 | VA | 686 | – | – | – | 86 | – | – | – | – | 18 | 70 vs. 67% | 49 vs. 41% | 41 vs. 62%c |
| 1984 | CASS | 780 | 51 | 10 | 9 | 73 | – | – | – | – | 10 | 19.2 vs. 21.8% | – | 8.9 vs. 36.9%d |
| 2011/2016 | STICH | 1212 | 60 | 12 | 39 | 91 | 27 | Death | 4.7 | 36 vs. 41% | 9.8 | 58.9 vs. 66.1%\* | – | – |
| **PTCA vs. MT** |  |  |  |  |  |  |  |  |  |  |  |  |  |  |
| 1997 | RITA-2 | 1018 | – | 18 | 9 | 40 | – | Death or MI | 2.7 | 6.3 vs. 3.3%\* | 7 | 8.5 vs. 8.4% | 6.3 vs. 4.5%c | 27.2 vs. 35.4%c |
| 1999 | AVERT | 341 | 58 | 16 | 16 | 43 | 61 | Cardiac death, cardiac arrest, MI, CVA, revascularization, or hospitalization due to angina | 1.5 | 20.9 vs. 13.4%\* | 1.5 | 0.6 vs. 0.6%a | 2.8 vs. 2.4%c | 16 vs. 12%c |
| 2003 | ALKK | 300 | 58 | 13 | 16 | 0 | – | MI, revascularization, or rehospitalization for severe angina | 1 | 10 vs. 18% | 4.7 | 4.0 vs. 11.2%\* | 6.7 vs. 7.9% | 17 vs. 24% |
| 2007 | SWISSI-II | 201 | 55 | 12 | 11 | – | 57 | Cardiac death, MI, or revascularization | 10.2 | 28.1 vs. 63.8%\* | 10.2 | 6.3 vs. 21.0%\* | 11.5 vs. 38.1%\* | 27.1 vs. 43.8%\* |
| **BMS/CABG vs. MT** |  |  |  |  |  |  |  |  |  |  |  |  |  |  |
| 2001 | TIME | 305 | 80 | 43 | 23 | 79 | 53 | Death, MI, or hospitalization for ACS | 0.5 | 19.0 vs. 49.3%\* | 1 | 11.1 vs. 8.1% | – | – |
| 2007 | MASS-II | 611 | 60 | 31 | 29 | 100 | 67 | Cardiac death, MI, or revascularization | 1 | 6.4 (CABG) vs. 24.4 (BMS) vs. 14.3% (MT)\* | 10 | 25.1 (CABG) vs. 24.9 (PCI) vs. 31% (MT) | 10.3 (CABG) vs. 13.3 (PCI) vs. 20.7% (MT)\* | 7.4 (CABG) vs. 41.9 (PCI) vs. 39.4% (MT)\* |
| **BMS vs. MT** |  |  |  |  |  |  |  |  |  |  |  |  |  |  |
| 2006 | OAT | 2166 | 59 | 22 | 21 | 18 | 48 | Death, MI, or NYHA class IV heart failure | 4 | 17.2 vs. 15.6% | 4 | 9.1 vs. 9.4% | 6.9 vs. 5.0% | 18.4 vs. 22.0%\* |
| 2007 | COURAGE | 2287 | 62 | 15 | 33 | 69 | 61 | Death or MI | 4.6 | 19.0 vs. 18.5% | 4.6 | 7.6 vs. 8.3% | 13.2 vs. 12.3% | 21.1 vs. 32.6%\* |
| 2008 | JSAP | 384 | 64 | 26 | 40 | 32 | 65 | Death, ACS, CVA, or emergency hospitalization | 3.3 | 22.0 vs. 33.2%\* | 3.3 | 2.9 vs. 3.9% | 1.6 vs. 3.8% | 21.4 vs. 36.5%\* |
| **DES vs. MT** |  |  |  |  |  |  |  |  |  |  |  |  |  |  |
| 2012/2014 | FAME-2 | 888 | 64 | 22 | 27 | 42 | – | Death, MI, or urgent revascularization | 1 | 4.3 vs. 12.7%\* | 1 | 1.3 vs. 1.8% | 5.8 vs. 6.8% | 8.1 vs. 40.6%\* |

 

Age
and ejection fraction are reported as means. \*P <0.05.

ACS
= acute coronary syndrome; BMS = bare-metal stents; CABG = coronary artery
bypass grafting; CVA = cerebrovascular accident; DES = drug-eluting stents; EF =
left ventricular ejection fraction; MI = myocardial infarction; MT = medical
therapy; MVD = multivessel coronary artery disease; NYHA = New York Heart
Association; PCI = percutaneous coronary intervention; PTCA = percutaneous
transluminal coronary angioplasty.

aCardiac death.

bInclusion criteria.

cNo statistical analyses performed.

dRepeat CABG, excluding PTCA.

 

 

### **Supplementary Table 3** **Percutaneous vs. surgical revascularization: study, baseline characteristics, primary endpoint, maximum clinical follow-up**

### 

 

|  |  |  |  |  |  |  |  |  |  |  |  |  |  |  |  |  |
| --- | --- | --- | --- | --- | --- | --- | --- | --- | --- | --- | --- | --- | --- | --- | --- | --- |
| **Year of publication** | **Study** | ***n*** | **Baseline characteristics** | | | | | **Primary endpoint** | | | **Max clinical follow-up** | | | | |  |
| **Age (y)** | **Women (****%****)** | **Diabetes (****%****)** | **MVD** **(****%****)** | **EF (****%****)** | **Definition** | **Years** | **Results** | **Years** | **Death** | **MI** | **Revascularization** | **Stroke** |  |
| **PTCA** |  |  |  |  |  |  |  |  |  |  |  |  |  |  |  | © ESC 2018 |
| 1993 | RITA-I | 1011 | – | 19 | 6 | 55 | – | Death or MI | 2.5 | 9.8 vs. 8.6% | 6.5 | 7.6 vs. 9.0% | 10.8 vs. 7.4% | 44.3 vs. 10.8%\* | 1.8 vs. 2.0%  (at 2.5 years) |
| 1994 | GABI | 359 | – | 20 | 12 | 100 | – | Angina | 1 | 29 vs. 26% | 13 | 25.0 vs. 21.9% | 4.3 vs. 5.6% | 82.9 vs. 58.8%\* | – |
| 1994 | EAST | 392 | 62 | 26 | 23 | 100 | 61 | Death, MI, or a large defect at thallium scan | 3 | 28.8 vs. 27.3% | 8 | 20.7 vs. 17.3% | 3.0 vs. 10.3%\* (at 3 year) | 65.3 vs. 26.5%\* | 0.5 vs. 1.5%  (at 3 years) |
| 1995 | CABRI | 1054 | 60 | 22 | 12 | 99 | 63 | Death | 1 | 3.9 vs. 2.7% | 4 | 10.9 vs. 7.4% | 4.9 vs. 3.5%  (at 1 year) | 33.6 vs. 6.5%\*  (at 1 year) | – |
| 1996 | BARI | 1829 | 62 | 27 | 25 | 100 | 57 | Death | 5 | 13.7 vs. 10.7% | 10 | 29.0 vs. 26.5% | – | 76.8 vs. 20.3%\* | 0.2 vs. 0.8%  (in hospital) |
| **BMS** |  |  |  |  |  |  |  |  |  |  |  |  |  |  |  |
| 2001 | AWESOME | 454 | 67 | – | 31 | 82 | 45 | Death | 3 | 20 vs. 21% | 3 | 20 vs. 21% | – | – | – |
| 2001 | ERACI II | 450 | 62 | 21 | 17 | 100 | – | Death, MI, stroke, or repeat revascularization | 0.1 | 3.6 vs. 12.3%\* | 5 | 7.1 vs. 11.5% | 2.8 vs. 6.2% | 28.4 vs. 7.2%\* | 0 vs. 0.9% (at 30 days) |
| 2001 | ARTS | 1205 | 61 | 23 | 17 | 99 | 61 | Death, MI, stroke, or repeat revascularization | 1 | 26.2 vs. 12.2%\* | 5 | 8.0 vs. 7.6% | 6.7 vs. 5.6% | 30.3 vs. 8.8%\* | 3.8 vs. 3.5% |
| 2002 | SoS | 988 | 61 | 21 | 14 | 100 | 57 | Repeat revascularization | 2 | 21 vs. 6%\* | 6 | 10.9 vs. 6.8%\* | 5 vs. 8%  (at 2 years) | 21 vs. 6%\*  (at 2 years) | – |
| 2003 | OCTOSTENT | 280 | 60 | 29 | 11 | 29 | – | Death, MI, stroke, or repeat revascularization | 1 | 14.5 vs. 8.5% | 1 | 0 vs. 2.8% | 4.4 vs. 4.9% | 15.2 vs. 4.2%\* | 0 vs. 0% |
| 2005 | Thiele | 220 | 62 | 25 | 30 | 0 | 63 | Cardiac death, MI, or TVR | 0.5 | 31 vs. 15%\* | 5.6 | 10 vs. 12% | 5 vs. 7% | 32 vs. 10%\* (TVR) | – |

 

Age and
ejection fraction are reported as means. \**P*<0.05.

BMS
= bare-metal stents; EF = ejection fraction; MI = myocardial infarction; MVD =
multivessel coronary artery disease; PTCA = percutaneous transluminal coronary
angioplasty; TVR = target vessel revascularization.

  

**Supplementary  Table****4** **Scoring systems
used in conjunction with myocardial revascularization**

 

|  |  |  |  |
| --- | --- | --- | --- |
| **Score** | **Purpose** | **URL** | © ESC 2018 |
| ***Outcomes after myocardial revascularization or ACS*** | | |
| EuroSCORE II | Prediction of in-hospital mortality | www.euroscore.org |
| STS | Prediction of in-hospital or 30-day mortality, and in-hospital morbidity | www.sts.org |
| SYNTAX | Prediction of medium- and long-term MACCE after PCI | www.syntaxscore.com |
| SYNTAX II | Prediction of mortality after CABG or PCI | www.syntaxscore.com |
| GRACE | Prediction of death or death/myocardial infarction following ACS | www.gracescore.org |
| ***DAPT treatment duration*** | |  |
| PRECISE-DAPT | To determine short (3–6 months) vs. standard/long (12–24 months) DAPT duration at the time of coronary stenting | www.precisedaptscore.com |
| DAPT | To determine standard DAPT (12 months) vs. long DAPT (30 months) after 12 months of uneventful DAPT | www.daptstudy.org |
| ***Embolic and bleeding risk prediction*** | |  |
| CHA2DS2-VASc | Prediction of stroke risk in patients with atrial fibrillation (relevant in a setting of PCI to determine the indication for OAC) | www.chadsvasc.org |
| HAS-BLED | Prediction of bleeding risk, e.g. in a setting of DAPT and OAC (triple treatment) | www.chadsvasc.org |
| ABC | Prediction of bleeding risk, e.g. in a setting of DAPT and OAC (triple treatment) | www.ucr.uu.se/en/services/abc-risk-calculators |
| ***Frailty*** | |  |
| Clinical Frailty Score | To assess frailty as a predictor of death and length of hospital stay | http://geriatricresearch.medicine.dal.ca/ clinical\_frailty\_scale.htm |

 

ABC = Age, Biomarkers,
Clinical History; ACS = acute coronary syndrome; CABG = coronary artery bypass
grafting; CHA2DS2-VASc = Cardiac failure, Hypertension,
Age >\_75 (Doubled), Diabetes, Stroke (Doubled) – Vascular disease, Age 65–74 and Sex category (Female); DAPT = dual antiplatelet treatment; GRACE = Global Registry of Acute Coronary
Events; HAS-BLED = Hypertension, Abnormal renal/liver function, Stroke,
Bleeding history or predisposition, Labile INR, Elderly, Drugs/alcohol; MACCE =
major adverse cardiovascular events;
OAC = oral anticoagulation; PCI = percutaneous coronary intervention; PRECISE-DAPT = PREdicting bleeding
Complications In patients
undergoing Stent implantation and subsEquent Dual Anti Platelet Therapy;
STS = Society of Thoracic Surgeons; SYNTAX = Synergy between Percutaneous
Coronary Intervention with TAXUS and Cardiac
Surgery.

  

### **Supplementary Table 5** **Randomized trials on revascularization in diabetic patients**

 

|  |  |  |  |  |  |  |  |  |  |  |  |  |  |  |  |  |
| --- | --- | --- | --- | --- | --- | --- | --- | --- | --- | --- | --- | --- | --- | --- | --- | --- |
| **Year of publication** | **Study** | ***n*** | **Baseline characteristics** | | | | **Primary endpoint** | | | **Max clinical follow-up** | | | | | |  |
| **Age (y)** | **Women (****%****)** | **MVD** **(****%****)** | **EF (****%****)** | **Definition** | **Years** | **Results** | **Years** | **Death** | **CV**  **death** | **MI** | **Revascula****rization** | **Stroke** |  |
| **Revascularization vs. MT** |  |  |  |  |  |  |  |  |  |  |  |  |  |  |  | © ESC 2018 |
| 2009 | BARI-2D10 | 2368 | 62 | 30 | 31a | 57 | Death | 5 | 11.7 vs. 12.2% | 5 | 11.7 vs. 12.2% | 5.9 vs. 5.7% | 11.5 vs. 14.3% | – | 2.6 vs. 2.8% |
| **CABG vs. MT** |  |  |  |  |  |  |  |  |  |  |  |  |  |  |  |
| 2009 | BARI-2Db 10 | 763 | 63 | 24 | 52a | 57 | Death | 5 | 13.6 vs. 16.4% | 5 | 13.6 vs. 16.4% | 8.0 vs. 9.0% | 10.0 vs. 17.6%\* | – | 1.9 vs. 2.6% |
| **PCI vs. MT** |  |  |  |  |  |  |  |  |  |  |  |  |  |  |  |
| 2009 | BARI-2Db 10 | 1605 | 62 | 33 | 20a | 57 | Death | 5 | 10.8 vs. 10.2% | 5 | 10.8 vs. 10.2% | 5.0 vs. 4.2% | 12.3 vs. 12.6% | – | 2.9 vs. 2.9% |
| **PCI vs. CABG** |  |  |  |  |  |  |  |  |  |  |  |  |  |  |  |
| 2009 | SYNTAXc 11 | 452 | 65 | 29 | 100 | – | Death, MI, stroke, or repeat revascularization | 1 | 26.0 vs. 14.2%\*  Sx-Sc 0-22: 20.3  vs. 18.3%; 23-32:  26.0 vs. 12.9%;  >\_33: 32.4 vs. 12.2%\* | 5 | 19.5 vs. 12.9% | 12.7 vs. 6.5%\* | 9.0 vs. 5.4% | 35.3% vs. 14.6%\* | 3.0 vs. 4.7% |
| 2010 | CARDia12 (DES/ BMS vs. CABG) | 510 | 64 | 26 | 93 | – | Death, MI, or stroke | 1 | 13.0 vs. 10.5% | 1 | 3.2 vs. 3.2% | – | 9.8 vs. 5.7% | 11.8% vs. 2.0%\* | 0.4 vs. 2.8% |
| 2012 | FREEDOM13 (DES vs. CABG) | 1900 | 63 | 29 | 100 | 66 | Death, MI, or stroke | 3.8 | 26.6 vs. 18.7%\*  Sx-Sc 0-22: 23  vs. 17%;23-32:  27 vs. 18%\*;  >\_33: 31 vs. 23% | 3.8 | 16.3 vs. 10.9%\* | 10.9 vs. 6.8% | 13.9 vs. 6.0%\* | 12.6% vs. 4.8%\* (at 1 year) | 2.4 vs. 5.2%\* |
| 2013 | VA-CARDS14 (DES vs. CABG) | 207 | 62 | 1 | – | – | Death or MI | 2 | 25.3 vs. 18.4% | 2 | 21 vs. 5.0%\* | 10.8 vs. 5.0% | 6.2 vs. 15.0% | 18.9% vs. 19.5% | 1.0 vs. 1.2% |

 

Age and
ejection fraction are reported as means. \**P*<0.05.

BMS = bare-metal stents; CABG = coronary artery
bypass grafting; DES = drug-eluting stents; EF = ejection fraction; MI = myocardial infarction; MVD = multivessel coronary
artery disease; MT = medical
therapy; PCI = percutaneous coronary interventions; Sx-Sc = SYNTAX score

aThree-vessel disease.

bRandomization stratified by revascularization modality.

cSubgroup analysis.

  

**Supplementary  Table 6** **CE-approved new-generation drug-eluting stents recommended for clinical use based on** **randomized trials
with a primary clinical endpoint
(in alphabetical order)**

 

|  |  |  |  |  |  |
| --- | --- | --- | --- | --- | --- |
| **DES** | **Stent platform** | **Polymer coating** | **Drug** | **References** | © ESC 2018 |
| Based on durable polymer coatings | | | |  |
| Promus element | Platinum–chrome | PBMA and PVDF-HFP | Everolimus | 15,16 |
| Resolute | Cobalt–chrome | PBMA, PHMA, PVP, and PVA | Zotarolimus | 16–18 |
| Xience | Cobalt–chrome | PBMA and PVDF-HFP | Everolimus | 19–21 |
| EluNIR (BioNIR) | Cobalt–chrome | PBMA and TSPCU | Ridaforolimus | 22 |
| Based on biodegradable polymer coatings | | | |  |
| Biomatrix | Stainless steel | PDLLA | Biolimus A9 | 23,24 |
| Nobori | Stainless steel | PDLLA | Biolimus A9 | 25–27 |
| Orsiro | Cobalt–chrome | PLLA | Sirolimus | 28,29 |
| Synergy | Platinum–chrome | PLGA | Everolimus | 29 |
| Ultimaster | Stainless steel | PDLLA/PCL | Sirolimus | 30 |
| Yukon Choice PC | Stainless steel | PDLLA | Sirolimus | 31 |
| Polymer-free |  |  |  |  |
| BioFreedom | Stainless steel | – | Biolimus A9 | 32 |
| Yukon Choice PF | Stainless steel | – | Sirolimus | 33 |

 

DES = drug-eluting stent;
PBMA = poly n-butyl methacrylate; PC = polymer-coated; PDLLA = poly(D,L)-lactic acid; PDLLA/PCL = poly (D,L)-lactide-co-caprolactone; PF = pol ymer-free; PHMA = polyhexyl
methacrylate; PLGA = poly(d,l-lactide-*co*-glycolide);
PLLA = poly-L-lactic acid; PVA = polyvinyl acetate; PVDF-HFP ¼ poly(vinylidene fluoridecohexafluoropropylene); PVP
= polyvinyl pyrrolidone; TSPCU = thermoplastic silicone-polycarbonate-urethane.

  

**Supplementary Table 7** **Overview of
CE-marked bioresorbable scaffolds**

 

|  |  |  |  |  |  |  |  |  |  |  |  |  |
| --- | --- | --- | --- | --- | --- | --- | --- | --- | --- | --- | --- | --- |
| **Commercial name** | **Manufacturer** | **Backbone material** | **Coating material** | **Device** **thickness** | **Drug** **release** | **Drug load** | **Duration of** **drug release** | **Bioresorption** **in pre-clinical** **swine models** | **Year of CE-mark** | **Year of FDA** **approval** | **Year of PMDA (Japan) approval** | © ESC 2018 |
| ABSORB BVS 1.1 | Abbott Vascular | PLLA | PDLLA | 156 mm | Everolimus | 76–308 lg/ stent | 3 months | 36 months | 2011 | 2016 | 2016 |
| DESolve (þ DESolve 100/ DESolve Cx/ DESolve NXT) | Elixir Medical | PLLA | PLLA | 100–150 mm | Novolimus | NA | 3 months | 24 months | 2014 | NA | NA |
| ART Pure | ART | PDLLA | NA | 170 mm | No drug elution | NA | NA | 24 months | 2015 | NA | NA |
| Magmaris | Biotronik | Magnesium alloy | PLLA | 150 mm | Sirolimus | 1.4 lg/mm2 | 3 months | 9 - 12 months | 2016 | NA | NA |
| Fantom | Reva | PTD-PC | PTD-PC | 125 mm | Sirolimus | 115 mg | NA | <3 years | 2017 | NA | NA |

 

BVS =
bioresorbable vascular scaffold; FDA = US Food and Drug Administration; NA =
not available; PDLLA = poly(D,L)-lactic acid; PLLA = poly-L-lactic
acid; PMDA = Pharmaceuticals and Medical Devices Agency; PTD-PC =
poly-tyrosine-derived polycarbonate.

  

**Supplementary Table 8** **CE-approved drug-coated** **balloons (in alphabetical order)**

 

|  |  |  |  |  |
| --- | --- | --- | --- | --- |
| **Device** | **Carrier** | **Drug** | **References** | © ESC 2018 |
| Agent | ATBC | Paclitaxel |  |
| Angiosculpt | NDGA | Paclitaxel | – |
| Danubio | BTHC | Paclitaxel | – |
| Dior II | Shellac | Paclitaxel | 34,35 |
| Elutax | – | Paclitaxel | 36 |
| IN.PACT Falcon | Urea | Paclitaxel | 37 |
| MagicTouch | Phospholipid- based | Sirolimus |  |
| Moxy | Polysorbate | Paclitaxel | 38 |
| Pantera Lux | BTHC | Paclitaxel | 39 |
| Prote´ge´ NC | BTHC | Paclitaxel | – |
| SeQuent Please | Iopromide | Paclitaxel | 40–44 |

 

ATBC = acetyl
tributyl citrate; BTHC = butyryl-tri-hexyl citrate; NDGA =
nordi-hydroguaiaretic acid.

 

**Supplementary Table 9****Quality indicators for coronary artery bypass grafting**

 

|  |  |
| --- | --- |
| **Pre-operative** | © ESC 2018 |
| Beta-blocker therapy |
| **Operative technique** |
| Percentage of internal mammary artery use |
| Selection and duration of antibiotic prophylaxis |
| **Post-operative outcome rates** |
| Death |
| Stroke |
| Renal failure requiring dialysis |
| Re-exploration for bleeding |
| Re-intervention for graft failure |
| Prolonged intubation time >24 h |
| Deep sternal wound infection requiring sternal reconstruction |
| **Discharge** |
| Antiplatelet medication prescription |
| High-dose lipid-lowering treatment prescription |
| Adherence to guideline-recommended discharge medications depending on clinical setting |
| **Follow-up** |
| Readmission rates at 90 days |
| 30 day and 1 year mortality |
| Unplanned repeat revascularization at 1 year |

 

Reference: http://www.sts.org/quality-safety/performance-measures (accessed 4 February 2018).

 

**Supplementary Table 10** **Quality Indicators for percutaneous coronary
intervention**

 

 

|  |  |
| --- | --- |
| **Pre-interventional** | © ESC 2018 |
| Adherence to guideline-recommended pre-treatment |
| **Interventional technique** |
| Procedural success |
| Percentage of radial arterial access |
| Percentage of drug-eluting stent implantation |
| **Peri-interventional outcome rates** |
| Death |
| Periprocedural myocardial infarction |
| Stroke |
| Contrast-induced nephropathy |
| Major bleeding (BARC 3 - 5) |
| Emergency coronary artery bypass surgery |
| **Discharge** |
| Antiplatelet medication prescription |
| High-dose lipid lowering treatment prescription |
| Adherence to guideline-recommended discharge medications depending on clinical setting |
| **Follow-up** |
| Readmission rates |
| 30 day and 1 year mortality |
| Unplanned repeat revascularization at 1 year |
| Stent thrombosis according to ARC criteria |
| Major bleeding (BARC 3 - 5) |
| Composite of all-cause death, any myocardial infarction, and any unplanned repeat revascularization at 1 year |

 

ARC =
Academic Research Consortium; BARC = Bleeding Academic Research Consortium.

 

**Supplementary  Table****11** **Antithrombotic drug dose adjustment in patients with chronic kidney disease**

 

|  |  |  |  |  |  |
| --- | --- | --- | --- | --- | --- |
|  | **Normal kidney function or stage 1–2 CKD (****≥****60 mL/min/****1.73m2)** | **Stage 3 CKD (****≥****30–59 mL/min/ 1.73m2)** | **Stage 4 CKD (15–29**  **mL/min/1.73m2)** | **Stage 5 CKD (<15 mL/min/1.73m2)** | © ESC 2018 |
| **ASA** | No dose adjustment | No dose adjustment | No dose adjustment | No dose adjustment |
| **Clopidogrel** | No dose adjustment | No dose adjustment | No dose adjustment | Use only for selected indications (e.g. stent thrombosis prevention) |
| **Prasugrel** | No dose adjustment | No dose adjustment | No dose adjustment | Not recommended |
| **Ticagrelor** | No dose adjustment | No dose adjustment | No dose adjustment | Not recommended |
| **Cangrelor** | No dose adjustment | No dose adjustment | No dose adjustment | No dose adjustment |
| **Enoxaparin** | 1 mg/kg s.c. twice a day | | 1 mg/kg s.c. once a day; monitor anti-factor-Xa activity | Not recommended |
| **Unfractionated heparin** | •    Prior to coronary angiography: 60–70 IU/kg i.v. (max 5000 IU) and infusion 12–15 IU/kg/h (max 1000 IU/h), target aPTT 1.5–2.5× control  •    During PCI: according to ACT or 70–1000 IU/kg  i.v. in patients not anticoagulated (50–70 IU/kg if concomitant with GP IIb/IIIa inhibitors) | | No dose adjustment | No dose adjustment |
| **Fondaparinux** | 2.5 mg s.c. once a day | 1.5 mg s.c. once a day | Not recommended if eGFR <20 mL/min/ 1.73m2) | Not recommended |
| **Bivalirudin** | Bolus 0.75 mg/kg i.v., infusion 1.75 mg/kg/h | Bolus 0.75 mg/kg i.v., infusion 1.4 mg/kg/h | Not recommended | Not recommended |
| **Abciximab** | Bolus 0.25 mg/kg i.v., infusion rate 0.125 g/ kg/min (maximum 10 g/min) | No specific recommendations for the use of abciximab, or for dose adjustment in the case of renal failure; careful evaluation of haemorrhagic risk is needed | | |
| **Eptifibatide** | Bolus 180 g/kg i.v., infusion rate 2 g/kg/ min | No adjustment of bolus, reduce infusion rate to 1 g/kg/min if eGFR <50 mL/min/1.73m2 | Not recommended | Not recommended |
| **Tirofiban** | Bolus 25 g/kg or 10 g/kg i.v., infusion rate 0.15 g/kg/min | No dose adjustment | No adjustment of bolus, reduce infusion rate to 0.05 g/kg/min | Not recommended |

 

aPTT = activated partial
thromboplastin time; ACT = activated clotting time; ASA = acetylsalicylic acid (aspirin);
CKD = chronic kidney disease; eGFR = estimated glomerular filtration rate; GP =
glycoprotein; i.v. = intravenous; PCI = percutaneous coronary intervention;
s.c. = subcutaneous.

**Supplement to chapter 7: revascularization
in ST-segment elevation myocardial infarction**

**Studies on
the revascularization strategy in patients presenting with ST-elevation
myocardial infarction and multivessel disease**

In the PRAMI
(Preventive Angioplasty in Acute Myocardial Infarction) trial (*n* = 465),
preventive PCI in the non-IRA with stenosis ≥ 50% during the index PCI, when
compared with PCI limited to the IRA, was associated with a reduced risk of the
composite of death, MI, or refractory angina (HR in the preventive PCI group
0.35, 95% CI 0.21–0.58, *P* <0.001).45 CvLPRIT (Complete
Versus Lesion-Only Primary PCI Trial) randomized 296 STEMI patients with
multivessel disease into either in-hospital complete revascularization
(simultaneous or staged) or IRA-only revascularization.46 The primary
endpoint-a composite of all-cause death, recurrent MI, HF, and ischaemia-driven
revascularization within 12 months-occurred in 10.0% of the complete
revascularization group vs. 21.2% in the IRA-only revascularization group (HR
0.45, 95% CI 0.24–0.84, *P* = 0.009).

The
DANAMI-3-PRIMULTI study allocated 627 patients after successful IRA PCI to
either no further invasive treatment or complete FFR-guided revascularization
of the non-IRA before discharge. The primary endpoint of all-cause mortality,
non-fatal MI, and ischaemia-driven revascularization of lesions in the non-IRA
at median follow-up of 27 months occurred in 68 (22%) patients who had IRA PCI
only and in 40 (13%) patients who had complete revascularization (HR 0.56, 95%
CI 0.38–0.83; *P* = 0.004).47 The benefit was
driven by a reduction in repeat revascularization.

The
Compare-Acute trial randomized 885 patients with STEMI and multivessel disease
undergoing primary PCI to either complete revascularization of the non-IRA
(guided by FFR) or no revascularization of the non-IRA.48 The main finding was
a reduction in the primary endpoint incidence (death, MI, revascularization, or
stroke) (HR 0.35, 95% CI 0.22–0.55; *P* <0.001), with multivessel PCI
driven mainly by a reduction in the need for revascularization at a later time
point by non-IRA FFR-guided revascularization. However, it might also be
observed that the overall rate of revascularization was considerably higher in
the complete revascularization group.

**Revascularization strategy in patients with
myocardial infarction and cardiogenic shock**

One-year data
from the SHOCK (Should We Emergently Revascularize Occluded Coronaries for
Cardiogenic Shock) trial (*n* = 302) showed a significant advantage of
early revascularization over medical therapy among patients younger than 75.49 A subanalysis
comparing CABG to PCI revealed similar survival rates between the two subgroups
despite the fact that CABG was more often performed in patients with advanced,
multivessel disease including LM disease, while patients with one- or
two-vessel disease prevailed in the PCI arm.50

The SHOCK
registry demonstrated that emergency revascularization with PCI or CABG
improved long-term survival when compared with initial intensive medical
therapy.51,52 All-cause mortality
at 6 months was lower in the group assigned to revascularization than in the
medically treated patients (50.3 vs. 63.1%, respectively; RR 0.80, 95% CI
0.65–0.98; *P <* 0.03). The findings of this non-randomized comparison
suggest that CABG should be considered in patients with cardiogenic shock who
have suitable anatomy, particularly if successful PCI is not feasible. A recent
analysis of the Korean Acute Myocardial Infarction Registry (16 620 STEMI
patients) suggested that multivessel revascularization at the time of primary PCI
was associated with better outcomes in patients with STEMI and cardiogenic
shock compared with culprit vessel revascularization only.53 These studies suggested
that multivessel PCI should be considered in STEMI patients with cardiogenic
shock.

In the
CULPRIT-SHOCK (Culprit Lesion Only PCI Versus Multivessel PCI in Cardiogenic
Shock) trial, patients with STEMI or non-ST-segment elevation myocardial infarction
(NSTEMI) with cardiogenic shock were randomized to culprit lesion-only PCI or
immediate PCI of all obstructive lesions (i.e. those with >70% stenosis of
the diameter). In the multivessel PCI group, recanalization of chronic total
occlusions was performed when possible, and complete revascularization was
achieved in 81% of patients. Staged revascularization was performed in 17.7% of
the patients in the culprit lesion-only PCI group, and the crossover rate was
relatively low (12.5% in the culprit lesion-only PCI group and 9.4% in the
multivessel PCI group). The primary endpoint of death or severe renal failure
leading to renal replacement therapy was higher with immediate multivessel PCI
than with culprit lesion-only PCI. The results were similar for death from any
cause (RR 0.84, 95% CI 0.72–0.98, *P* = 0.03) and were consistent across
pre-specified subgroups, including subgroups defined according to the presence
or absence of a chronic total occlusion.

The CULPRIT-SHOCK
trial used modern PCI technique and periprocedural management, and provides
clear evidence that a strategy of culprit lesion-only PCI is preferred over
initial multivessel PCI for patients with cardiogenic shock. Multivessel PCI
should not be performed on a routine basis but may be considered in some
patients, e.g. if there is uncertainty in identifying the culprit lesion.

**Supplement to chapter 10: revascularization
in patients with chronic kidney disease**

**Prevention
of contrast-induced nephropathy**

The risk of
CIN depends on patient-related factors, such as CKD, diabetes mellitus,
congestive HF, haemodynamic instability, reduced plasma volume, female sex,
advanced age, and anaemia, as well as on the type and volume of contrast
administered.54,55 As compared with
high-osmolar contrast agents, low- or iso-osmolar contrast agents reduce the
risk of CIN.56–58 The preference for
iso- over low-osmolar contrast agents, suggested by an initial small study,56 could not be
confirmed subsequently.59 When the ratio of
total contrast volume to GFR exceeds 3.7, the risk of CIN increases
significantly.60,61 Performing diagnostic
and interventional procedures separately reduces the total volume exposure to
contrast media. On the other hand, the risk of renal atheroembolic disease
increases with multiple catheterizations. Therefore, in CKD patients with
diffuse atherosclerosis, a single invasive approach (diagnostic angiography
followed by *ad hoc* PCI) may be considered if the contrast volume can be maintained
at <4 mL/kg.

It is
generally recommended that all patients with CKD who undergo catheterization
should receive preventive hydration with isotonic saline.62 Nevertheless, this
recommendation is based on limited data on the comparison of isotonic saline
with hypotonic saline63 or with sodium
bicarbonate.64,65 However, no
randomized trial until recently had compared intravenous pre-hydration with no
prophylaxis. Moreover, the superiority of isotonic saline over sodium
bicarbonate seen in the initial studies did not prevail in a recent
meta-analysis.66 Likewise, in the contemporary AMACING
(A Maastricht Contrast-Induced Nephropathy Guideline) randomized trial,
intravenous 0.9% sodium chloride was directly compared with no prophylaxis in
660 patients with an estimated GFR of 30–59 mL/min/1.73 m2 undergoing an
elective procedure requiring iodinated contrast material.67 Within 2-6 days after
contrast exposure, no prophylaxis was non-inferior to intravenous hydration for
the prevention of CIN and cost-saving. These findings need to be interpreted
with consideration of the single-centre design of the trial and the relatively
small sample size of the low-risk cohort.67

Given the
known impact of low effective circulating volumes on the risk of CIN, there is
still consensus that adequate hydration is needed to prevent CIN. Based on
previous experience,64,65,68 preventive hydration with isotonic saline should be
started in patients at increased risk approximately 12 h before angiography and
continued for at least 24 h afterwards to reduce the risk of CIN, especially if
GFR is <40 mL/min/1.73 m2. The optimal duration of the infusion therapy is not
fully known. Recently, promising results were obtained by adjusting the
infusion rate to central venous pressure.69 Two targeted
hydration regimens starting shortly before catheterization have shown
superiority over conventional hydration schemes.70,71 In the POSEIDON
(Prevention of Contrast Renal Injury with Different Hydration Strategies)
study, patients with CKD stage 3 were randomly assigned to infusion rates adjusted
to LV end-diastolic pressure or to standard infusion rates.70 CIN occurred less
frequently in patients of the targeted hydration group (6.7%) than in the
control group (16.3%; RR 0.41, 95% CI 0.22–0.79, *P* = 0.005). Similarly
in a high-risk group of patients with CKD, the REMEDIAL II (Renal Insufficiency
After Contrast Media Administration II) trial showed that a strategy of
controlled hydration with forced diuresis and matched saline infusion using an
automated system was superior to the control group [incidence of CIN 11 vs.
20.5%; odds ratio (OR) 0.47, 95% CI 0.24–0.92).71 The findings of
REMEDIAL II were confirmed in a recent meta-analysis including three additional
studies.72 Thus, in specific patient subsets, the
targeted hydration regimens represent a valuable alternative to standard
hydration.

Apart from
adequate hydration, several preventative strategies for CIN have been tested in
a number of studies with inconsistent results, as reviewed by several
meta-analyses.66,68,73 In a recent hierarchical Bayesian network meta-analysis
of 124 trials and 28 240 patients undergoing cardiac catheterization,66 only high-dose
statins showed an unequivocal beneficial effect that-according to another
meta-analysis-appeared to be independent of the concomitant hydration protocol.74 Although
theophylline, N-acetylcysteine (NAC), sodium bicarbonate, peripheral ischaemic
pre-conditioning, and natriuretic peptide also showed some benefit over saline
alone in the overall analysis, these findings were highly heterogeneous across
studies and did not prevail in sensitivity analyses.66 None of the apparent
benefits were detectable in diabetics and some (theophylline and sodium
bicarbonate) were mitigated in patients with CKD stage 3 or 4.66 The results were
confounded by publication bias, the inclusion of trials with lower
methodological quality, and suboptimal posology.66 More recently, the PRESERVE
(Prevention of Serious Adverse Events Following Angiography) trial tested the
efficacy of intravenous sodium bicarbonate or oral acetylcysteine in preventing
CIN.75 This randomized controlled trial included
5177 patients at high risk for renal complications who were scheduled for
angiography. Using a two-by-two factorial design, PRESERVE did not show any
benefit of intravenous sodium bicarbonate over intravenous sodium chloride, or
of oral acetylcysteine over placebo, for the prevention of death, need for
dialysis, or persistent decline in kidney function at 90 days.

In summary,
adequate hydration remains the mainstay of CIN prevention. High-dose statins
are also beneficial. Since they are indicated for secondary prevention in
patients undergoing coronary revascularization irrespective of the risk of CIN,
no specific recommendation for CIN is needed. All other strategies for the
prevention of CIN do not have sufficient evidence to justify a recommendation
in favour or against.

For patients
undergoing CABG, the effectiveness of the implementation of pharmacological
preventive measures—such as clonidine, fenoldopam, natriuretic peptides, NAC,
or elective pre-operative haemodialysis—remains unproven.

**Supplement to chapter 11: revascularization
in patients requiring valve interventions**

**Surgical
repair of secondary mitral regurgitation in patients undergoing coronary artery
bypass grafting**

Controversy
exists regarding the definition of `moderate' MR used in the CTSN trial. In the
CTSN trial, the integrative approach for the classification of MR, inclusive of
an EROA of 0.2–0.39 cm2, as described by the American Society of
Echocardiography (ASE), was used to define moderate MR. However, both the ASE
and European Association for Cardiovascular Imaging Guidelines for valvular
regurgitation acknowledge that in ischaemic MR (IMR), an EROA of >0.2 cm2 and a regurgitant
volume of >30 mL indicates a worse prognosis and greater risk of
cardiovascular events.76,77 The 2017 ESC/EACTS
Guidelines for the management of valvular heart disease define an EROA of
>0.2 cm2 and a regurgitant
volume of >30 mL as the cut-off for severe secondary MR.78 Furthermore, due to
several screening failures in the early phase of the CTSN trial, thought to be
due to overly restrictive EROA, the criteria were broadened to include patients
with EROA <0.2 cm2 and other integrative
criteria of more than mild MR.79 In summary therefore,
the CTSN trial on moderate IMR included patients with IMR defined by EROA
<0.4 cm2, and did not
demonstrate an improvement in outcomes with surgical correction of secondary MR
in combination with CABG compared with CABG alone. While this is not consistent
with current Guidelines on the classification of IMR as described above, the
main value of the reduced threshold for severe IMR is based on prognostic
outcomes of patients with EROA >0.2 cm2. The use of this classification in
guiding treatment would present challenges with either leaving clinically
significant IMR (EROA >0.4 cm2) untreated or the over-treatment of patients
with EROA <0.4 cm2, where the addition
of mitral repair has not been shown to improve outcomes.

The dynamic
nature of IMR also needs consideration and stress echo may be used to guide
treatment, although no robust evidence is available to guide this
recommendation. Ultimately, IMR remains a complex area with unanswered
questions despite several randomized trials. The present Guidelines express the
expert opinion and consensus of the Task Force, and are also in keeping with
the valvular heart disease Guidelines. Treatment decisions should be made in
the context of the Heart Team taking into account the severity of MR,
comorbidities, symptoms, LV and LA size, the viability of revascularized
myocardium, completeness of revascularization, tenting area, and coaptation
height. Additionally, with the advent of rapidly advancing techniques for
transcatheter mitral valve repair/replacement and mitral annuloplasty, a Heart
Team discussion on the feasibility of future transcatheter treatment options in
patients undergoing myocardial revascularization may be used as a guide to
decision-making.

**Supplement to chapter 16: procedural
aspects of percutaneous coronary intervention**

**Studies on
the Absorb bioresorbable vascular scaffold**

Primary
endpoint results from the ABSORB II (A Bioresorbable Everolimus-Eluting Scaffold
Versus a Metallic Everolimus-Eluting Stent II) trial failed to demonstrate
superiority of the Absorb BVS (bioresorbable vascular scaffold) vs.
conventional DES in terms of vasomotor response to intracoronary nitrate in the
stented segment at 3 years.80 Moreover, the
co-primary endpoint late lumen loss was inferior with BVS and there was no
difference in terms of patient-reported angina symptoms. There was a
significant increase in the device-oriented composite endpoint of cardiac
death, target vessel MI, and clinically indicated target lesion
revascularization (TLR) with BRS compared with DES (10.4 vs. 4.9%; *P* =
0.043), which was driven by a significant difference in target vessel MI (6 vs.
1%; *P* = 0.011) and in definite or probable device thrombosis (3 vs. 0%; *P*
= 0.033). This excess in late adverse clinical events was also seen in the 2
year results of the ABSORB III and ABSORB Japan trial.81

ABSORB IV,
the largest available trial on BRS, which applied a dedicated technique for BRS
implantation, showed inferior procedural outcomes with BRS as compared with
EES. The ABSORB IV demonstrated the non-inferiority of BRS as compared with EES
for the primary endpoint target lesion failure (a composite of cardiac death,
MI, and ischaemia-driven TLR) at 30 days (HR 1.36, 95% CI 0.93–1.97, *P*non-inferiority = 0.02). Device
thrombosis tended to be higher with BRS than EES at 30 days (HR 4.05, 95% CI
0.86–19.07; *P* = 0.06).

The AIDA
(Amsterdam Investigator-Initiated Absorb Strategy All-Comers)
investigator-initiated trial82 enrolled relatively
unselected patients undergoing intervention in routine practice including
patients with ACS. The trial intended to test the non-inferiority of BRS vs.
EES at 2 years. However, during follow-up and after full enrolment, the data
and safety monitoring board of the trial recommended early reporting due to
safety concerns. At the time of reporting, the median duration of follow-up was
707 days. The primary endpoint—a composite of cardiac death, target vessel MI,
or TVR—was similar in both groups (11.7 vs. 10.7%; HR 1.12, 95% CI 0.85–1.48, *P*
= 0.43). Definite/probable stent thrombosis was significantly higher in the BRS
treatment group (3.5 vs. 0.9%; *P* <0.001).

Meta-analyses
including mid- to long-term follow-up of randomized trials of Absorb BRS vs.
conventional DES showed that the risk of adverse events beyond 1 year is also
significantly increased with BRS.83–86

A recently
published individual patient data pooled analysis of 3389 patients from four
randomized trials on BRS vs. EES (ABSORB II, ABSORB III, ABSORB China, and
ABSORB Japan) showed a higher risk of target lesion failure (a composite of
cardiac death, MI, and ischaemia-driven TLR) with BRS as compared with EES at 3
years. This difference was the result of inferior effectiveness
(ischaemia-driven TLR; HR 1.46, 95% CI 1.06–2.02) and inferior safety (device thrombosis;
HR 3.79, 95% CI 1.72–8.36) with BRS compared with EES at 3 years of follow-up.83

**Supplement to chapter 17: antithrombotic
treatments**

**TRITON-TIMI
38: NSTEMI and STEMI patients**

Prasugrel, a third-generation
thienopyridine, is a pro-drug that irreversibly inhibits the P2Y12 receptor on blood
platelets. The drug, administered at a 60 mg loading dose and a 5/10 mg
maintenance dose, shows fast and predictable platelet inhibition.87 Prasugrel was tested
against clopidogrel in the TRITON-TIMI 38 (TRial to Assess Improvement in
Therapeutic Outcomes by Optimizing Platelet InhibitioN with
Prasugrel-Thrombolysis In Myocardial Infarction 38)
study.88 In the entire trial cohort88 (*n* = 13 608)
and specifically for the 10 074 NSTE-ACS patients in TRITON-TIMI 38,89 the primary endpoint
was reduced in prasugrel- vs. clopidogrel-treated patients, while TIMI non-CABG
major bleeding complications were more common with prasugrel, as were fatal
bleeds. Excluding patients with a higher bleeding risk, prasugrel offers
significant benefit over clopidogrel with respect to ischaemic events without
significantly increasing major bleeding.89 Especially in
diabetic ACS patients, prasugrel showed a net clinical benefit with a
substantial reduction in ischaemic events without a significantly increased
bleeding risk.90 Based on an unfavourable risk-benefit
profile observed in the TRITON TIMI 38 study cohort,88 a maintenance dose of
prasugrel is contraindicated in patients with a history of stroke or TIA.
Further on, treatment with prasugrel should be used with caution in patients
≥75 years of age or with a low body weight (<60 kg). If, after a careful
assessment of thrombotic and bleeding risk, treatment is deemed necessary in
these patients, a reduced maintenance dose of 5 mg should be prescribed.91

In a
pre-specified subgroup analysis of STEMI patients (*n* = 3534) in the
TRITON-TIMI 38 trial,92 the benefit of prasugrel
was consistent for the primary endpoint and stent thrombosis risk at 15 months.
Of note, no significant increase in non-CABG-related major bleeding events was
observed and cardiovascular mortality was in favour of prasugrel at 30 days.
Thus, for the STEMI group of patients, prasugrel was found to be more effective
when compared with clopidogrel, without an apparent excess in bleeding
complications.

**PLATO: NSTEMI and STEMI patients**

Ticagrelor is
a cyclopentyl triazolopyrimidine that reversibly inhibits the P2Y12 receptor. Along with
a PCI procedure, it is administered at a 180 mg loading dose followed by a 90
mg b.i.d. daily maintenance dose. Ticagrelor was tested against clopidogrel in
the PLATO (Platelet Inhibition and Patient Outcomes) trial in medically and
invasively (PCI or CABG) managed patients.93 The PLATO study
randomly assigned 18 624 ACS patients to treatment with ticagrelor or
clopidogrel and showed a significant improvement in the composite ischaemic endpoint,
including a mortality benefit in favour of ticagrelor.93 Ticagrelor was
associated with a higher rate of major non-CABG-related bleeding events,
including more fatal intracranial bleeds and fewer fatal bleeds of other types.
Within the PLATO study cohort, 11 080 patients94 were categorized as
NSTE-ACS at randomization and 46% of those were treated with PCI. In the NSTEMI
cohort, the primary study endpoint of cardiovascular death as well as all-cause
death was reduced with ticagrelor. Of note, ticagrelor was associated with an
increase in non-CABG major bleeding and with an increased rate of adverse
effects including dyspnoea, increased frequency of ventricular pauses, and
asymptomatic increases in uric acid in all its major trials.93–95 These
adverse effects, especially the temporary occurrence of dyspnoea, may influence
patient compliance, and close surveillance and patient education is required to
avoid premature treatment discontinuation. Comparative data coming from
randomized comparisons of ticagrelor vs. prasugrel in NSTEMI patients are
limited. The ongoing ISAR-REACT 5 trial, enrolling NSTEMI as well as STEMI patients
(>4000) with planned invasive management, will provide evidence in this
respect.96

In the subset
of STEMI patients randomized in the PLATO trial,97 the benefit of ticagrelor
over clopidogrel for the primary endpoint was borderline significant but
consistent with the overall study results. As for prasugrel, no excess in
bleeding events was observed. In a pooled analysis of 48 599 patients, of whom
94% presented with ACS and 84% had PCI, novel P2Y12 inhibitors, including
prasugrel and ticagrelor, have been associated with a mortality benefit and no
significant excess of major bleeding among STEMI patients.98

**Studies on cangrelor for percutaneous
coronary intervention**

In two
initial clinical trials on clopidogrel-naïve patients, cangrelor was compared
with clopidogrel, administered either before PCI in CHAMPION (Cangrelor versus
Standard Therapy to Achieve Optimal Management of Platelet Inhibition)-PCI (*n*
= 8714) or after PCI in CHAMPION-PLATFORM (*n* = 5362). Both studies
failed to show a significant benefit with respect to the composite endpoint of
death, MI, or ischaemia-driven revascularization at 48 h. Yet, in CHAMPION-PLATFORM,
there was a significant reduction in the rate of stent thrombosis from 0.6 to
0.2% (OR 0.31, 95% CI 0.11–0.85; *P* = 0.02), which was not seen in
CHAMPION-PCI with upfront administration of clopidogrel. In both trials, there
was an increase in ACUITY major bleeding that approached (*P* = 0.06 in
CHAMPION-PCI) or reached (*P* <0.001 in CHAMPION-PLATFORM) statistical
significance.

A third
trial, CHAMPION PHOENIX, was designed that administered clopidogrel after PCI,
included stent thrombosis in the primary endpoint, and chose GUSTO (Global
Utilization of Streptokinase and Tissue Plasminogen Activator for Occluded
Coronary Arteries) severe bleeding as the primary safety endpoint. In this
trial including 11 145 P2Y12 inhibitor-naïve patients, the primary efficacy endpoint
of death, MI, ischaemia-driven revascularization, and stent thrombosis at 48 h
was met (4.7% in the cangrelor group and 5.9% in the clopidogrel group;
adjusted OR 0.78, 95% CI, 0.66–0.93, *P* = 0.05). There was a significant
reduction in stent thrombosis (0.8 vs. 1.4%) that was predominantly driven by
intra-procedural stent thrombosis (0.6 vs. 1.0%; *P* = 0.04). A subsequent
meta-analysis of all CHAMPION trials revealed a statistically significant 0.7%
absolute reduction in death, MI, ischaemia-driven revascularization, and stent
thrombosis at 30 days (*P* = 0.008), and a significant 0.5% absolute
reduction in death, Q-wave MI, and stent thrombosis (*P* = 0.009), which
includes a significant 0.4% absolute reduction in intra-procedural and post-procedural
stent thrombosis (*P* = 0.018). These benefits occurred at the expense of
a significant increase in ACUITY major bleeding (4.2 vs. 2.8%, *P*
<0.001), which prevailed after the exclusion of major haematomas. There were
no significant differences in GUSTO severe or TIMI major bleeding. In the
meta-analysis as well as in CHAMPION PHOENIX, the benefit of cangrelor with
respect to ischaemic endpoints was independent of the clinical presentation
with stable angina, NSTE-ACS, or STEMI.

In summary,
the available evidence on cangrelor suggests a numerically small benefit with
respect to major ischaemic endpoints that is counterbalanced by an increase in
relevant bleeding, but not severe bleeding. Moreover, comparison between
CHAMPION-PLATFORM and CHAMPION-PCI suggests that the benefit of cangrelor might
have been diminished by upstream administration of clopidogrel at the time of
PCI. Of note, the drug was never evaluated in a randomized fashion for NSTEMI
or STEMI patients when potent P2Y12 inhibitors were used for oral antiplatelet
treatment (either upfront or subsequently). Nevertheless, due to its proven
efficacy in preventing intra-procedural and post-procedural stent thrombosis,
cangrelor may be considered in P2Y12 inhibitor-naïve patients, particularly when
the risk of PCI is high.

**Studies on bivalirudin vs. unfractionated
heparin**

A number of
large-scale clinical trials have compared bivalirudin vs. UFH (plus GP IIb/IIIa
blockade). In the ACUITY (Acute Catheterization and Urgent Intervention Triage
strategy) trial,99 no significant differences were
observed for UFH/LMWH plus GP IIb/IIIa inhibitor vs. bivalirudin plus GP
IIb/IIIa inhibitor for the composite ischaemia endpoint at 30 days or for major
bleeding complications. Bivalirudin alone (with bail-out use of a GP IIb/ IIIa
inhibitor) was also non-inferior to UFH/LMWH combined with a GP IIb/IIIa
inhibitor with respect to the ischaemic endpoint, but it was associated with a
significantly lower rate of major bleeding. ISAR-REACT 4 (Intracoronary
Stenting and Antithrombotic Regimen Rapid Early Action for Coronary Treatment)
compared the outcome of UFH plus abciximab vs. bivalirudin.100 The primary ischaemic
endpoint did not differ between the two groups, while the risk of major
bleeding was significantly higher in the UFH plus abciximab group. It must be
acknowledged that the above-mentioned evidence in support of bivalirudin is
derived from clinical trials where bivalirudin was compared with UFH plus the
use of a GP IIb/IIIa inhibitor, a combination that is not used on a routine
basis anymore.

In the
HORIZONS-AMI (Harmonizing Outcomes with Revascularization and Stents in Acute
Myocardial Infarction) trial in 3602 STEMI patients,101 bivalirudin was
superior to UFH with respect to the two primary endpoints of net adverse
clinical events, which included a significant survival benefit. In contrast to
that, the risk of stent thrombosis was higher during the first 24 h in the
bivalirudin group. In a background of potent antiplatelet agents (approximately
50% utilization of prasugrel or ticagrelor) including pre-treatment and a high
rate of radial access (47%), the open-label EUROMAX (European Ambulance Acute
Coronary Syndrome Angiography) trial compared a strategy of pre-hospital
bivalirudin vs. UFH or LMWH with optional use (69%) of GP IIb/IIIa inhibitors
in 2218 STEMI patients.102 The primary endpoint
of death or non-CABG major bleeding at 30 days was significantly reduced by
pre-hospital administration of bivalirudin compared with UFH plus optional GP
IIb/IIIa inhibitors. Mortality rates were similar and a lower risk of major
bleeding (mainly driven by blood transfusion) was observed for bivalirudin.
Again, the risk of stent thrombosis was higher in the bivalirudin group.
Further data on bivalirudin vs. UFH was generated in the single-centre
HEAT-PPCI (How Effective are Antithrombotic Therapies in primary PCI) study,103 a randomized trial
comparing bivalirudin and UFH in 1829 STEMI patients undergoing primary PCI. Of
note, HEAT-PPCI is characterized by contemporary practice including the
restriction of GP IIb/IIIa inhibitors to bail-out situations (<10% patients)
only, frequent (>90%) use of potent P2Y12 inhibitors, and a radial approach with
preferred DES implantation in STEMI. The primary endpoint was significantly
higher in the bivalirudin compared with the UFH group, which includes a
substantially higher risk of stent thrombosis for bivalirudin vs. UFH but no
significant difference in mortality. For major bleeding events, no significant
differences were observed either. The BRAVE (Bavarian Reperfusion Alternatives
Evaluation) 4 trial examined the hypothesis of whether a strategy of prasugrel
plus bivalirudin (*n* = 269) was superior compared with a strategy of
clopidogrel plus UFH (*n* = 275) in primary PCI STEMI patients.104

While it has to
be acknowledged that the trial was terminated prematurely, the investigators
were unable to show any significant differences in net clinical outcome between
prasugrel plus bivalirudin and clopidogrel plus UFH.

More data on
the comparison of bivalirudin vs. UFH alone and with very limited use (<1%)
of GP IIb/IIIa inhibitors in the study arms comes from the MATRIX trial,105 where 7213 ACS
patients with planned PCI were enrolled. Patients in the bivalirudin group were
also randomized to post-PCI bivalirudin infusion or not. The primary outcomes,
30 day MACE and net adverse clinical events (a composite of major bleeding or
MACE), were not significantly lower with bivalirudin than with heparin (10.3
vs. 10.9%, *P* = 0.44, and 11.2 vs. 12.4%, *P* = 0.12, respectively).
Concerning secondary endpoints, bivalirudin compared with heparin was
associated with a lower rate of death from any cause (1.7 vs. 2.3%, *P* =
0.04), a higher rate of definite stent thrombosis (1.0 vs. 0.6%, *P* =
0.048), and a lower rate of major bleeding (1.4 vs. 2.5%, *P* <0.001).
Of note, a post-PCI bivalirudin infusion, as compared with no infusion, did not
affect outcome.

Recently, the
VALIDATE-SWEDEHEART study,106 a randomized, registry-based,
open-label clinical trial, enrolled 6006 patients with STEMI or NSTE-ACS who
were undergoing PCI by predominantly radial access and receiving treatment with
a potent P2Y12 inhibitor
(ticagrelor, prasugrel, or cangrelor) without the planned use of GP IIb/IIIa
inhibitors. The primary endpoint-the 180 day composite incidence of death from
any cause, MI, or major bleeding-was reached in 12.3% of the patients in the
bivalirudin group and 12.8% in the heparin group (*P* = 0.54). There were
no significant differences in any component of the primary endpoint or in stent
thrombosis. Thus, the study demonstrated similar risk patterns for both
ischaemia and bleeding when comparing the two drugs.

Summarizing
currently available evidence on the comparison between bivalirudin and heparin
for PCI in ACS, a recent study-level meta-analysis identified 12 randomized
trials with 33 844 patients included.107 The 30 day incidences
of MACE and all-cause mortality were not significantly different between
bivalirudin and heparin (OR 1.06, 95% CI 0.96–1.17, *P* = 0.24 and OR
0.95, 95% CI 0.76–1.20, *P*= 0.68, respectively). There were trends for an
increased risk of stent thrombosis (OR 1.24, 95% CI 0.99–1.56; *P*= 0.06)
and for a decreased risk of major bleeding (OR 0.68, 95% CI 0.41–1.11; *P*=
0.07) with bivalirudin as compared with heparin. Except for bleeding risk, the
findings were consistent irrespective of balanced use of GP IIb/IIIa inhibitors
in both arms or preferential use in the heparin arms. Concerning the bleeding
risk, there was a significant heterogeneity between trials stratified by use of
GP IIb/IIIa inhibitors (*P*<0.01), with a significant reduction of
bleeding risk only in trials with preferential GP IIb/IIIa inhibitor use in the
heparin arms (OR 0.53, 95% CI 0.41–0.68, *P*<0.0001). In the subsets
with STEMI or NSTE-ACS, the findings were also largely consistent with the
overall analysis. There was only a trend towards a lower risk of death with
bivalirudin in the subgroup of patients presenting with STEMI (OR 0.84, 95% CI
0.70–1.01, *P*= 0.06) with *P*= 0.07 for heterogeneity. Yet, no firm
conclusion could be drawn from this finding given the inconclusive *P*-values,
the absent effect in the overall analysis, and the fact that the STEMI subset
comprised a higher proportion of trials with predominant use of GP IIb/IIIa
inhibitors in the UFH arm than the studies in NSTE-ACS. In summary, the
available evidence from randomized trials does not favour bivalirudin use over
heparin as the anticoagulant of choice for PCI in ACS.

**Revascularization in patients with renal
failure**

Renal
dysfunction is present in 30–40% of patients with CAD and the extent of CKD is
strongly related to the risk of in-hospital adverse outcomes.108–110 Creatinine clearance should be calculated
with the Cockroft–Gault formula to comply with drug labelling and avoid
overdosing with antithrombotics leading to increased bleeding risk.111,112 In patients referred
for acute PCI, the first dose of an antithrombotic drug does not usually add to
the risk of bleeding in the case of CKD. Repeated infusion or intake might lead
to drug accumulation and an increase in bleeding risk. Accordingly, patients
with CKD should receive the same first-line treatment as any other patient in
the absence of contraindications. Thereafter, dose adaptation is mandatory with
respect to kidney function and specific antithrombotic agents may be preferred
(Supplementary Table 11).

**Monitoring of antiplatelet drugs (platelet
function testing and genotyping)**

There is a
potential value of antiplatelet treatment monitoring on a prognostic level, and
on the level of testing for modifying and individualizing treatment. Based on
the results of a collaborative meta-analysis that represents the largest
dataset available to date (*n* = 20 389 patients), platelet reactivity
assessment during P2Y12 inhibitor treatment
identifies PCI-treated patients with a high on-treatment platelet reactivity
who are at higher risk for mortality and stent thrombosis, and patients with a
low on-treatment platelet reactivity who are at an elevated risk for major
bleeding.113 This dataset and study data from the
ADAPT-DES (Assessment of Dual Antiplatelet Therapy With Drug-Eluting Stents)
trial,114 representing the largest prospective
registry in this field, showed that platelet function (PF) testing provides
relevant prognostic information on the outcome of PCI-treated patients.

Prior
randomized trials [GRAVITAS (Gauging Responsiveness with A VerifyNow
assay-Impact on Thrombosis And Safety), TRIGGER-PCI (Testing platelet
Reactivity In patients underGoing elective stent placement on clopidogrel to
Guide alternative thErapy with pRasugrel), and ARCTIC (Assessment by a Double
Randomization of a Conventional Antiplatelet Strategy versus a Monitoring-guided
Strategy for Drug-Eluting Stent Implantation and of Treatment Interruption
versus Continuation One Year after Stenting)], testing the hypothesis of the
clinical benefit of PF monitoring to adjust therapy, have so far failed to
demonstrate clinical benefit with PF monitoring.115–117 These initial
trials had a common approach of escalating treatment based on testing results obtained
during or early after PCI. A further study, the ANTARCTIC (Platelet function
monitoring to adjust antiplatelet therapy in elderly patients stented for an
acute coronary syndrome) trial, addressed some limitations of prior studies and
specifically focused on elderly ACS patients. This study also provided neutral
results and utilized a standard treatment with a reduced dose of 5 mg prasugrel,118 aiming to treat
patients towards a therapeutic window of platelet inhibition.

A pure DAPT
de-escalation strategy with a stage-adapted treatment approach was investigated
in the randomized TROPICAL-ACS (Testing responsiveness to platelet inhibition
on chronic antiplatelet treatment for acute coronary syndromes) trial.119 In that trial, the
primary endpoint was met and a strategy of PF testing-guided DAPT de-escalation
(early switch from prasugrel to clopidogrel) was found to be non-inferior and
safe in terms of ischaemic risk when compared with potent platelet inhibition
for 12 months after ACS-PCI. Thus, a guided de-escalation of P2Y12 inhibitor treatment
(e.g. with a switch from prasugrel or ticagrelor to clopidogrel) may be
considered as an alternative treatment strategy in ACS patients, and especially
for patients deemed unsuitable for 12 months potent platelet inhibition.

The influence
of genetic variants on the response to antiplatelet agents, especially
clopidogrel, has been well established in patients with ACS and planned PCI.120 Rapidly obtained
genetic information on the 2C19 genotype can help in reaching the optimal
window of P2Y12 inhibition according
to the cytochrome P2C19 profile,121,122 but no randomized trial has ever
demonstrated any clinical benefit of such an approach. A number of clinical
trials in this field are ongoing.

In summary,
neither PF testing nor genetic testing can be recommended on a routine basis
for tailoring and escalating DAPT after stenting in all PCI-treated patients.
Testing may be considered to: (i) de-escalate DAPT treatment, (ii) test the
compliance to treatment, or (iii) obtain prognostic information on the
individual patient for the time period after PCI.

**2. References for material in supplementary
appendix**

1.
Parisi AF, Folland ED, Hartigan P. A comparison of
angioplasty with medical therapy in the treatment of single-vessel coronary
artery disease. *Veterans Affairs ACME
Investigators.* *N Engl J Med* 1992;**326**:10–16.

2.
Henderson RA, Pocock SJ, Clayton TC, Knight R, Fox KA, Julian DG, Chamberlain
DA, Second Randomized Intervention Treatment of Angina (RITA-2) Trial
Participants. Seven-year outcome in the RITA-2 trial: Coronary angioplasty
versus medical therapy. *J Am Coll Cardiol* 2003;**42**:1161–1170.

3.
Pitt B, Waters D, Brown WV, van Boven AJ, Schwartz L, Title LM, Eisenberg D,
Shurzinske L, McCormick LS. Aggressive lipid-lowering therapy compared with
angioplasty in stable coronary artery disease. *Atorvastatin
versus Revascularization Treatment Investigators.* *N Engl J Med*
1999;**341**:70–76.

4.
Pfisterer M, Buser P, Osswald S, Allemann U, Amann W, Angehrn W, Eeckhout E,
Erne P, Estlinbaum W, Kuster G, Moccetti T, Naegeli B, Rickenbacher P; Trial of
Invasive versus Medical therapy in Elderly patients (TIME) Investigators.
Outcome of elderly patients with chronic symptomatic coronary artery disease
with an invasive vs optimized medical treatment strategy: One-year results of
the randomized TIME trial. *JAMA* 2003;**289**:1117–1123.

5.
Hueb W, Lopes N, Gersh BJ, Soares PR, Ribeiro EE, Pereira AC, Favarato D, Rocha
AS, Hueb AC, Ramires JA. Ten-year follow-up survival of the Medicine,
Angioplasty, or Surgery Study (MASS II): A randomized controlled clinical trial
of 3 therapeutic strategies for multivessel coronary artery disease. *Circulation*
2010;**122**:949–957.

6.
Erne P, Schoenenberger AW, Burckhardt D, Zuber M, Kiowski W, Buser PT, Dubach
P, Resink TJ, Pfisterer M. Effects of percutaneous
coronary interventions in silent ischemia after myocardial infarction: The
SWISSI II randomized controlled trial. *JAMA* 2007;**297**:1985–1991.

7.
Weintraub WS, Spertus JA, Kolm P, Maron DJ, Zhang Z, Jurkovitz C, Zhang W,
Hartigan PM, Lewis C, Veledar E, Bowen J, Dunbar SB, Deaton C, Kaufman S,
O'Rourke RA, Goeree R, Barnett PG, Teo KK, Boden WE; COURAGE Trial Research
Group, Mancini GB. Effect of PCI on quality of life in
patients with stable coronary disease. *N Engl J Med* 2008;**359**:677–687.

8. De
Bruyne B, Pijls NH, Kalesan B, Barbato E, Tonino PA, Piroth Z, Jagic N,
Mobius-Winkler S, Rioufol G, Witt N, Kala P, MacCarthy P, Engstrom T, Oldroyd
KG, Mavromatis K, Manoharan G, Verlee P, Frobert O, Curzen N, Johnson JB, Juni
P, Fearon WF; FAME 2 Trial Investigators. Fractional flow reserve-guided PCI
versus medical therapy in stable coronary disease. *N Engl J Med* 2012;**367**:991–1001.

9.
Al-Lamee R, Thompson D, Dehbi HM, Sen S, Tang K, Davies J, Keeble T, Mielewczik
M, Kaprielian R, Malik IS, Nijjer SS, Petraco R, Cook C, Ahmad Y, Howard J,
Baker C, Sharp A, Gerber R, Talwar S, Assomull R, Mayet J, Wensel R, Collier D,
Shun-Shin M, Thom SA, Davies JE, Francis DP, investigators O. Percutaneous
coronary intervention in stable angina (ORBITA): a double-blind, randomised
controlled trial. *Lancet* 2018;**391**:31–40.

10.
BARI
2D Study Group, Frye RL, August P, Brooks MM, Hardison RM, Kelsey SF, MacGregor
JM, Orchard TJ, Chaitman BR, Genuth SM, Goldberg SH, Hlatky MA, Jones TL,
Molitch ME, Nesto RW, Sako EY, Sobel BE. A randomized trial
of therapies for type 2 diabetes and coronary artery disease. *N Engl
J Med* 2009;**360**:2503–2515.

11.
Kappetein
AP, Head SJ, Morice MC, Banning AP, Serruys PW, Mohr FW, Dawkins KD, Mack MJ;
SYNTAX Investigators. Treatment of complex coronary artery disease in patients
with diabetes: 5-year results comparing outcomes of bypass surgery and
percutaneous coronary intervention in the SYNTAX trial. *Eur J Cardiothorac
Surg* 2013;**43**:1006–1013.

12.
Kapur
A, Hall RJ, Malik IS, Qureshi AC, Butts J, de Belder M, Baumbach A, Angelini G,
de Belder A, Oldroyd KG, Flather M, Roughton M, Nihoyannopoulos P, Bagger JP,
Morgan K, Beatt KJ. Randomized comparison of percutaneous
coronary intervention with coronary artery bypass grafting in diabetic
patients. 1-year results of the CARDia (Coronary Artery Revascularization
in Diabetes) trial. *J Am Coll Cardiol* 2010;**55**:432–440.

13.
Farkouh
ME, Domanski M, Sleeper LA, Siami FS, Dangas G, Mack M, Yang M, Cohen DJ,
Rosenberg Y, Solomon SD, Desai AS, Gersh BJ, Magnuson EA, Lansky A, Boineau R,
Weinberger J, Ramanathan K, Sousa JE, Rankin J, Bhargava B, Buse J, Hueb W,
Smith CR, Muratov V, Bansilal S, King S III, Bertrand M, Fuster V; FREEDOM
Trial Investigators. Strategies for multivessel
revascularization in patients with diabetes. *N Engl J Med* 2012;**367**:2375–2384.

14.
Kamalesh
M, Sharp TG, Tang XC, Shunk K, Ward HB, Walsh J, King S III, Colling C, Moritz
T, Stroupe K, Reda D; CARDS Investigators VA. Percutaneous
coronary intervention versus coronary bypass surgery in United States veterans
with diabetes. *J Am Coll Cardiol* 2013;**61**:808–816.

15.
Stone
GW, Teirstein PS, Meredith IT, Farah B, Dubois CL, Feldman RL, Dens J, Hagiwara
N, Allocco DJ, Dawkins KD; PLATINUM Trial Investigators. A prospective,
randomized evaluation of a novel everolimus-eluting coronary stent: The
PLATINUM (a Prospective, Randomized, Multicenter Trial to Assess an
Everolimus-Eluting Coronary Stent System [PROMUS Element] for the Treatment of
Up to Two de Novo Coronary Artery Lesions) trial. *J Am Coll Cardiol* 2011;**57**:1700–1708.

16.
von
Birgelen C, Sen H, Lam MK, Danse PW, Jessurun GA, Hautvast RW, van Houwelingen
GK, Schramm AR, Gin RM, Louwerenburg JW, de Man FH, Stoel MG, Lowik MM, Linssen
GC, Said SA, Nienhuis MB, Verhorst PM, Basalus MW, Doggen CJ, Tandjung K.
Third-generation zotarolimus-eluting and everolimus-eluting stents in all-comer
patients requiring a percutaneous coronary intervention (DUTCH PEERS): A
randomised, single-blind, multicentre, non-inferiority trial. *Lancet*
2013;**383**:413–423.

17.
Serruys
PW, Silber S, Garg S, van Geuns RJ, Richardt G, Buszman PE, Kelbaek H, van
Boven AJ, Hofma SH, Linke A, Klauss V, Wijns W, Macaya C, Garot P, DiMario C,
Manoharan G, Kornowski R, Ischinger T, Bartorelli A, Ronden J, Bressers M,
Gobbens P, Negoita M, van Leeuwen F, Windecker S. Comparison of zotarolimus-eluting
and everolimus-eluting coronary stents. *N Engl J Med* 2010;**363**:136–146.

18.
von
Birgelen C, Basalus MW, Tandjung K, van Houwelingen KG, Stoel MG, Louwerenburg
JH, Linssen GC, Said SA, Kleijne MA, Sen H, Lowik MM, van der Palen J, Verhorst
PM, de Man FH. A randomized controlled trial in second-generation
zotarolimus-eluting Resolute stents versus
everolimus-eluting Xience V stents in real-world patients: The TWENTE trial. *J
Am Coll Cardiol* 2012;**59**:1350–1361.

19.
Stone
GW, Rizvi A, Newman W, Mastali K, Wang JC, Caputo R, Doostzadeh J, Cao S,
Simonton CA, Sudhir K, Lansky AJ, Cutlip DE, Kereiakes DJ. Everolimus-eluting
versus paclitaxel-eluting stents in coronary artery disease. *N Engl J
Med* 2010;**362**:1663–1674.

20.
Kedhi
E, Joesoef KS, McFadden E, Wassing J, van Mieghem C, Goedhart D, Smits PC.
Second-generation everolimus-eluting and paclitaxel-eluting stents in real-life
practice (COMPARE): A randomised trial. *Lancet* 2010;**375**:201–209.

21.
Sabate
M, Cequier A, Iniguez A, Serra A, Hernandez-Antolin R, Mainar V, Valgimigli M,
Tespili M, den Heijer P, Bethencourt A, Vazquez N, Gomez-Hospital JA, Baz JA,
Martin-Yuste V, van Geuns RJ, Alfonso F, Bordes P, Tebaldi M, Masotti M,
Silvestro A, Backx B, Brugaletta S, van Es GA, Serruys PW. Everolimus-eluting
stent versus bare-metal stent in ST-segment elevation myocardial infarction
(EXAMINATION): 1 year results of a randomised controlled trial. *Lancet*
2012;**380**:1482–1490.

22.
Kandzari
DE, Smits PC, Love MP, Ben-Yehuda O, Banai S, Robinson SD, Jonas M, Kornowski
R, Bagur R, Iniguez A, Danenberg H, Feldman R, Jauhar R, Chandna H, Parikh M,
Perlman GY, Balcells M, Markham P, Ozan MO, Genereux P, Edelman ER, Leon MB,
Stone GW. Randomized comparison of ridaforolimus- and zotarolimus-eluting
coronary stents in patients with coronary artery disease: Primary results from
the BIONICS Trial (BioNIR ridaforolimus-eluting coronary stent system in
coronary ctenosis). *Circulation* 2017;**136**:1304–1314.

23.
Windecker
S, Serruys PW, Wandel S, Buszman P, Trznadel S, Linke A, Lenk K, Ischinger T,
Klauss V, Eberli F, Corti R, Wijns W, Morice MC, di Mario C, Davies S, van
Geuns RJ, Eerdmans P, van Es GA, Meier B, Juni P. Biolimus-eluting stent with
biodegradable polymer versus sirolimus-eluting stent with durable polymer for
coronary revascularisation (LEADERS): A randomised non-inferiority trial. *Lancet*
2008;**372**:1163–1173.

24.
Raber
L, Kelbaek H, Ostojic M, Baumbach A, Heg D, Tuller D, von Birgelen C, Roffi M,
Moschovitis A, Khattab AA, Wenaweser P, Bonvini R, Pedrazzini G, Kornowski R,
Weber K, Trelle S, Luscher TF, Taniwaki M, Matter CM, Meier B, Juni P,
Windecker S; COMFORTABLE AMI Investigators. Effect of biolimus-eluting stents
with biodegradable polymer vs bare-metal stents on cardiovascular events among
patients with acute myocardial infarction: The COMFORTABLE AMI randomized
trial. *JAMA* 2012;**308**:777–787.

25.
Smits
PC, Hofma S, Togni M, Vazquez N, Valdes M, Voudris V, Slagboom T, Goy JJ,
Vuillomenet A, Serra A, Nouche RT, den Heijer P, van der Ent M. Abluminal biodegradable
polymer biolimus-eluting stent versus durable polymer everolimus-eluting stent
(COMPARE II): A randomised, controlled, non-inferiority trial. *Lancet*
2013;**381**:651–660.

26.
Natsuaki
M, Kozuma K, Morimoto T, Kadota K, Muramatsu T, Nakagawa Y, Akasaka T, Igarashi
K, Tanabe K, Morino Y, Ishikawa T, Nishikawa H, Awata M, Abe M, Okada H,
Takatsu Y, Ogata N, Kimura K, Urasawa K, Tarutani Y, Shiode N, Kimura T; NEXT
Investigators. Biodegradable polymer biolimus-eluting stent versus durable
polymer everolimus-eluting stent: A randomized, controlled, noninferiority
trial. *J Am Coll Cardiol* 2013;**62**:181–190.

27.
Christiansen
EH, Jensen LO, Thayssen P, Tilsted HH, Krusell LR, Hansen KN, Kaltoft A, Maeng
M, Kristensen SD, Botker HE, Terkelsen CJ, Villadsen AB, Ravkilde J, Aaroe J,
Madsen M, Thuesen L, Lassen JF; Scandinavian Organization for Randomized Trials
with Clinical Outcome V (SORT OUT V) Investigators. Biolimus-eluting
biodegradable polymer-coated stent versus durable polymer-coated
sirolimus-eluting stent in unselected patients receiving percutaneous coronary
intervention (SORT OUT V): A randomised non-inferiority trial. *Lancet*
2013;**381**:661–669.

28.
Pilgrim
T, Heg D, Roffi M, Tuller D, Muller O, Vuilliomenet A, Cook S, Weilenmann D,
Kaiser C, Jamshidi P, Fahrni T, Moschovitis A, Noble S, Eberli FR, Wenaweser P,
Juni P, Windecker S. Ultrathin strut biodegradable polymer sirolimus-eluting
stent versus durable polymer everolimus-eluting stent for percutaneous coronary
revascularisation (BIOSCIENCE): A randomised, single-blind, non-inferiority
trial. *Lancet* 2014;**384**:2111–2122.

29.
von
Birgelen C, Kok MM, van der Heijden LC, Danse PW, Schotborgh CE, Scholte M, Gin
RM, Somi S, van Houwelingen KG, Stoel MG, de Man FH, Louwerenburg JH, Hartmann
M, Zocca P, Linssen GC, van der Palen J, Doggen CJ, Lowik MM. Very thin strut
biodegradable polymer everolimus-eluting and sirolimus-eluting stents versus
durable polymer zotarolimus-eluting stents in allcomers with coronary artery
disease (BIO-RESORT): A three-arm, randomised, non-inferiority trial. *Lancet*
2016;**388**:2607–2617.

30.
Saito
S, Valdes-Chavarri M, Richardt G, Moreno R, Iniguez Romo A, Barbato E, Carrie
D, Ando K, Merkely B, Kornowski R, Eltchaninoff H, James S, Wijns W; CENTURY II
Investigators. A randomized, prospective, intercontinental evaluation of a
bioresorbable polymer sirolimus-eluting coronary stent system: The CENTURY II
(Clinical Evaluation of New Terumo Drug-Eluting Coronary Stent System in the
Treatment of Patients with Coronary Artery Disease) trial. *Eur Heart J*
2014;**35**:2021–2031.

31.
Byrne
RA, Kastrati A, Kufner S, Massberg S, Birkmeier KA, Laugwitz KL, Schulz S,
Pache J, Fusaro M, Seyfarth M, Schomig A, Mehilli J. Randomized,
non-inferiority trial of three limus agent-eluting stents with different polymer
coatings: The Intracoronary Stenting and Angiographic Results: Test Efficacy of
3 Limus-Eluting Stents (ISAR-TEST-4) Trial. *Eur Heart J* 2009;**30**:2441–2449.

32.
Urban
P, Meredith IT, Abizaid A, Pocock SJ, Carrie D, Naber C, Lipiecki J, Richardt G,
Iniguez A, Brunel P, Valdes-Chavarri M, Garot P, Talwar S, Berland J,
Abdellaoui M, Eberli F, Oldroyd K, Zambahari R, Gregson J, Greene S, Stoll HP,
Morice MC; LEADERS FREE Investigators. Polymer-free
drug-coated coronary stents in patients at high bleeding risk. *N Engl
J Med* 2015;**373**:2038–2047.

33.
Kufner
S, Sorges J, Mehilli J, Cassese S, Repp J, Wiebe J, Lohaus R, Lahmann A, Rheude
T, Ibrahim T, Massberg S, Laugwitz KL, Kastrati A, Byrne RA; ISAR-TEST-5 TriaL
Investigators. Randomized trial of polymer-free sirolimus- and probucol-eluting
stents versus durable polymer zotarolimus-eluting stents: 5-year results of the
ISAR-TEST-5 trial. *JACC Cardiovasc Interv* 2016;**9**:784–792.

34.
Stella
PR, Belkacemi A, Waksman R, Stahnke S, Torguson R, von Strandmann RP, Agostoni
P, Sangiorgi G, Silber S; Valentine Investigators. The Valentines Trial:
Results of the first one week worldwide multicentre enrolment trial, evaluating
the real world usage of the second generation DIOR paclitaxel drug-eluting
balloon for in-stent restenosis treatment. *EuroIntervention* 2011;**7**:705–710.

35.
Waksman
R, Serra A, Loh JP, Malik FT, Torguson R, Stahnke S, von Strandmann RP,
Rodriguez AE. Drug-coated balloons for de novo coronary lesions: Results from
the Valentines II trial. *EuroIntervention* 2013;**9**:613–619.

36.
Bondesson
P, Lagerqvist B, James SK, Olivecrona GK, Venetsanos D, Harnek J. Comparison of
two drug-eluting balloons: A report from the SCAAR registry. *EuroIntervention*
2012;**8**:444–449.

37.
Latib
A, Colombo A, Castriota F, Micari A, Cremonesi A, De Felice F, Marchese A,
Tespili M, Presbitero P, Sgueglia GA, Buffoli F, Tamburino C, Varbella F,
Menozzi A. A randomized multicenter study comparing a paclitaxel drug-eluting
balloon with a paclitaxel-eluting stent in small coronary vessels: The BELLO
(Balloon Elution and Late Loss Optimization) study. *J Am Coll Cardiol*
2012;**60**:2473–2480.

38.
Gutierrez-Chico
JL, van Geuns RJ, Koch KT, Koolen JJ, Duckers H, Regar E, Serruys PW.
Paclitaxel-coated balloon in combination with bare metal stent for treatment of
de novo coronary lesions: An optical coherence tomography first-in-human
randomised trial, balloon first vs. stent first. *EuroIntervention* 2011;**7**:711–722.

39.
Hehrlein
C, Dietz U, Kubica J, Jorgensen E, Hoffmann E, Naber C, Lesiak M, Schneider H,
Wiemer M, Tolg R, Richardt G. Twelve-month results of a paclitaxel releasing
balloon in patients presenting with in-stent restenosis First-in-Man (PEPPER)
trial. *Cardiovasc Revasc Med* 2012;**13**:260–264.

40.
Scheller
B, Hehrlein C, Bocksch W, Rutsch W, Haghi D, Dietz U, Bohm M, Speck U.
Treatment of coronary in-stent restenosis with a paclitaxel-coated balloon
catheter. *N Engl J Med* 2006;**355**:2113–2124.

41.
Unverdorben
M, Vallbracht C, Cremers B, Heuer H, Hengstenberg C, Maikowski C, Werner GS,
Antoni D, Kleber FX, Bocksch W, Leschke M, Ackermann H, Boxberger M, Speck U,
Degenhardt R, Scheller B. Paclitaxel-coated balloon catheter versus
paclitaxel-coated stent for the treatment of coronary in-stent restenosis. *Circulation*
2009;**119**:2986–2994.

42.
Habara
S, Mitsudo K, Kadota K, Goto T, Fujii S, Yamamoto H, Katoh H, Oka N, Fuku Y,
Hosogi S, Hirono A, Maruo T, Tanaka H, Shigemoto Y, Hasegawa D, Tasaka H,
Kusunose M, Otsuru S, Okamoto Y, Saito N, Tsujimoto Y, Eguchi H, Miyake K,
Yoshino M. Effectiveness of paclitaxel-eluting balloon catheter in patients
with sirolimus-eluting stent restenosis. *JACC Cardiovasc Interv* 2011;**4**:149–154.

43.
Rittger
H, Brachmann J, Sinha AM, Waliszewski M, Ohlow M, Brugger A, Thiele H,
Birkemeyer R, Kurowski V, Breithardt OA, Schmidt M, Zimmermann S, Lonke S, von
Cranach M, Nguyen TV, Daniel WG, Wohrle J. A randomized, multicenter,
single-blinded trial comparing paclitaxel-coated balloon angioplasty with plain
balloon angioplasty in drug-eluting stent restenosis: The PEPCAD-DES study. *J
Am Coll Cardiol* 2012;**59**:1377–1382.

44.
Byrne
RA, Neumann FJ, Mehilli J, Pinieck S, Wolff B, Tiroch K, Schulz S, Fusaro M,
Ott I, Ibrahim T, Hausleiter J, Valina C, Pache J, Laugwitz KL, Massberg S,
Kastrati A; ISAR-DESIRE 3 Investigators. Paclitaxel-eluting balloons,
paclitaxel-eluting stents, and balloon angioplasty in patients with restenosis
after implantation of a drug-eluting stent (ISAR-DESIRE 3): A randomised,
open-label trial. *Lancet* 2013;**381**:461–467.

45.
Wald
DS, Morris JK, Wald NJ, Chase AJ, Edwards RJ, Hughes LO, Berry C, Oldroyd KG;
PRAMI Investigators. Randomized trial of preventive
angioplasty in myocardial infarction. *N Engl J Med* 2013;**369**:1115–1123.

46.
Gershlick
AH, Khan JN, Kelly DJ, Greenwood JP, Sasikaran T, Curzen N, Blackman DJ, Dalby
M, Fairbrother KL, Banya W, Wang D, Flather M, Hetherington SL, Kelion AD,
Talwar S, Gunning M, Hall R, Swanton H, McCann GP. Randomized trial of complete
versus lesion-only revascularization in patients undergoing primary
percutaneous coronary intervention for STEMI and multivessel disease: The
CvLPRIT trial. *J Am Coll Cardiol* 2015;**65**:963–972.

47.
Engstrom
T, Kelbaek H, Helqvist S, Hofsten DE, Klovgaard L, Holmvang L, Jorgensen E, Pedersen
F, Saunamaki K, Clemmensen P, De Backer O, Ravkilde J, Tilsted HH, Villadsen
AB, Aaroe J, Jensen SE, Raungaard B, Kober L; DANAMI-3-PRIMULTI Investigators.
Complete revascularisation versus treatment of the culprit lesion only in
patients with ST-segment elevation myocardial infarction and multivessel
disease (DANAMI-3-PRIMULTI): An open-label, randomised
controlled trial. *Lancet* 2015;**386**:665–671.

48.
Smits
PC, Abdel-Wahab M, Neumann FJ, Boxma-de Klerk BM, Lunde K, Schotborgh CE,
Piroth Z, Horak D, Wlodarczak A, Ong PJ, Hambrecht R, Angeras O, Richardt G,
Omerovic E; Compare-Acute Investigators. Fractional flow
reserve-guided multivessel angioplasty in myocardial infarction. *N
Engl J Med* 2017;**376**:1234–1244.

49.
Hochman
JS, Sleeper LA, White HD, Dzavik V, Wong SC, Menon V, Webb JG, Steingart R,
Picard MH, Menegus MA, Boland J, Sanborn T, Buller CE, Modur S, Forman R,
Desvigne-Nickens P, Jacobs AK, Slater JN, LeJemtel TH; SHOCK Investigators. One-year survival following early revascularization for cardiogenic
shock. *JAMA* 2001;**285**:190–192.

50.
White
HD, Assmann SF, Sanborn TA, Jacobs AK, Webb JG, Sleeper LA, Wong CK, Stewart
JT, Aylward PE, Wong SC, Hochman JS. Comparison of percutaneous coronary
intervention and coronary artery bypass grafting after acute myocardial
infarction complicated by cardiogenic shock: Results from the Should We
Emergently Revascularize Occluded Coronaries for Cardiogenic Shock (SHOCK)
trial. *Circulation* 2005;**112**:1992–2001.

51.
Webb
JG, Lowe AM, Sanborn TA, White HD, Sleeper LA, Carere RG, Buller CE, Wong SC,
Boland J, Dzavik V, Porway M, Pate G, Bergman G, Hochman JS; SHOCK
Investigators. Percutaneous coronary intervention for
cardiogenic shock in the SHOCK trial. *J Am Coll Cardiol* 2003;**42**:1380–1386.

52.
Dzavik
V, Sleeper LA, Cocke TP, Moscucci M, Saucedo J, Hosat S, Jiang X, Slater J,
LeJemtel T, Hochman JS; SHOCK Investigators. Early revascularization is
associated with improved survival in elderly patients with acute myocardial
infarction complicated by cardiogenic shock: A report from the SHOCK Trial
Registry. *Eur Heart J* 2003;**24**:828–837.

53.
Park
JS, Cha KS, Lee DS, Shin D, Lee HW, Oh JH, Kim JS, Choi JH, Park YH, Lee HC,
Kim JH, Chun KJ, Hong TJ, Jeong MH, Ahn Y, Chae SC, Kim YJ; Korean Acute
Myocardial Infarction Registry Investigators. Culprit or
multivessel revascularisation in ST-elevation myocardial infarction with
cardiogenic shock. *Heart* 2015;**101**:1225–1232.

54.
Ohno
Y, Maekawa Y, Miyata H, Inoue S, Ishikawa S, Sueyoshi K, Noma S, Kawamura A,
Kohsaka S, Fukuda K. Impact of periprocedural bleeding on incidence of
contrast-induced acute kidney injury in patients treated with percutaneous
coronary intervention. *J Am Coll Cardiol* 2013;**62**:1260–1266.

55.
Mehran
R, Aymong ED, Nikolsky E, Lasic Z, Iakovou I, Fahy M, Mintz GS, Lansky AJ,
Moses JW, Stone GW, Leon MB, Dangas G. A simple risk score
for prediction of contrast-induced nephropathy after percutaneous coronary
intervention: Development and initial validation. *J Am Coll Cardiol* 2004;**44**:1393–1399.

56.
Aspelin
P, Aubry P, Fransson SG, Strasser R, Willenbrock R, Berg KJ. Nephrotoxic
effects in high-risk patients undergoing angiography. *N Engl J Med* 2003;**348**:491–499.

57.
Jo
SH, Youn TJ, Koo BK, Park JS, Kang HJ, Cho YS, Chung WY, Joo GW, Chae IH, Choi
DJ, Oh BH, Lee MM, Park YB, Kim HS. Renal toxicity evaluation and comparison
between visipaque (iodixanol) and hexabrix (ioxaglate) in patients with renal
insufficiency undergoing coronary angiography: The RECOVER study: A randomized
controlled trial. *J Am Coll Cardiol* 2006;**48**:924–930.

58.
Solomon
RJ, Natarajan MK, Doucet S, Sharma SK, Staniloae CS, Katholi RE, Gelormini JL,
Labinaz M, Moreyra AE. Cardiac Angiography in Renally Impaired Patients (CARE)
study: A randomized double-blind trial of contrast-induced nephropathy in
patients with chronic kidney disease. *Circulation* 2007;**115**:3189–3196.

59.
Pandya
B, Chaloub J, Parikh V, Gaddam S, Spagnola J, El-Sayegh S, Bogin M, Kandov R,
Lafferty J, Bangalore S. Contrast media use in patients with chronic kidney disease
undergoing coronary angiography: A systematic review and meta-analysis of
randomized trials. *Int J Cardiol* 2017;**228**:137–144.

60.
Marenzi
G, Assanelli E, Campodonico J, Lauri G, Marana I, De Metrio M, Moltrasio M,
Grazi M, Rubino M, Veglia F, Fabbiocchi F, Bartorelli AL. Contrast volume
during primary percutaneous coronary intervention and subsequent
contrast-induced nephropathy and mortality. *Ann Intern Med* 2009;**150**:170–177.

61.
Laskey
WK, Jenkins C, Selzer F, Marroquin OC, Wilensky RL, Glaser R, Cohen HA, Holmes
DR Jr. Volume-to-creatinine clearance ratio: A pharmacokinetically based risk
factor for prediction of early creatinine increase after percutaneous coronary
intervention. *J Am Coll Cardiol* 2007;**50**:584–590.

62.
Windecker
S, Kolh P, Alfonso F, Collet JP, Cremer J, Falk V, Filippatos G, Hamm C, Head
SJ, Juni P, Kappetein AP, Kastrati A, Knuuti J, Landmesser U, Laufer G, Neumann
FJ, Richter DJ, Schauerte P, Sousa Uva M, Stefanini GG, Taggart DP, Torracca L,
Valgimigli M, Wijns W, Witkowski A. 2014 ESC/EACTS Guidelines on myocardial
revascularization: The Task Force on Myocardial Revascularization of the
European Society of Cardiology (ESC) and the European Association for
Cardio-Thoracic Surgery (EACTS)Developed with the special contribution of the
European Association of Percutaneous Cardiovascular Interventions (EAPCI). *Eur
Heart J* 2014;**35**:2541–2619.

63.
Mueller
C, Buerkle G, Buettner HJ, Petersen J, Perruchoud AP, Eriksson U, Marsch S, Roskamm H. Prevention of contrast media-associated nephropathy:
Randomized comparison of 2 hydration regimens in 1620 patients undergoing
coronary angioplasty. *Arch Intern Med* 2002;**162**:329–336.

64.
Brar
SS, Shen AY, Jorgensen MB, Kotlewski A, Aharonian VJ, Desai N, Ree M, Shah AI,
Burchette RJ. Sodium bicarbonate vs sodium chloride for the prevention of
contrast medium-induced nephropathy in patients undergoing coronary
angiography: A randomized trial. *JAMA* 2008;**300**:1038–1046.

65.
Merten
GJ, Burgess WP, Gray LV, Holleman JH, Roush TS, Kowalchuk GJ, Bersin RM, Van Moore
A, Simonton CA III, Rittase RA, Norton HJ, Kennedy TP. Prevention of
contrast-induced nephropathy with sodium bicarbonate: *A randomized
controlled trial. JAMA* 2004;**291**:2328–34.

66.
Giacoppo
D, Gargiulo G, Buccheri S, Aruta P, Byrne RA, Cassese S, Dangas G, Kastrati A,
Mehran R, Tamburino C, Capodanno D. Preventive strategies for contrast-induced
acute kidney injury in patients undergoing percutaneous coronary procedures:
Evidence from a hierarchical Bayesian network meta-analysis of 124 trials and
28 240 patients. *Circ Cardiovasc Interv* 2017;**10**:e004383.

67.
Nijssen
EC, Rennenberg RJ, Nelemans PJ, Essers BA, Janssen MM, Vermeeren MA, Ommen VV,
Wildberger JE. Prophylactic hydration to protect renal function from
intravascular iodinated contrast material in patients at high risk of
contrast-induced nephropathy (AMACING): A prospective, randomised, phase 3, controlled, open-label, non-inferiority trial. *Lancet*
2017;**389**:1312–1322.

68.
Ali-Hassan-Sayegh
S, Mirhosseini SJ, Ghodratipour Z, Sarrafan-Chaharsoughi Z, Rahimizadeh E,
Karimi-Bondarabadi AA, Haddad F, Shahidzadeh A, Mahdavi P, Dehghan AM,
Tahernejad M, Shahidzadeh A, Dehghan H, Ghanei A, Lotfaliani M, Weymann A,
Zeriouh M, Popov AF, Sabashnikov A. Strategies preventing contrast-induced
nephropathy after coronary angiography: A comprehensive meta-analysis and
systematic review of 125 randomized controlled trials. *Angiology* 2017;**68**:389–413.

69.
Qian
G, Fu Z, Guo J, Cao F, Chen Y. Prevention of contrast-induced nephropathy by
central venous pressure-guided fluid administration in chronic kidney disease
and congestive heart failure patients. *JACC Cardiovasc Interv* 2016;**9**:89–96.

70.
Brar
SS, Aharonian V, Mansukhani P, Moore N, Shen AY, Jorgensen M, Dua A, Short L, Kane K. Haemodynamic-guided fluid administration
for the prevention of contrast-induced acute kidney injury: The POSEIDON
randomised controlled trial. *Lancet* 2014;**383**:1814–1823.

71.
Briguori
C, Visconti G, Focaccio A, Airoldi F, Valgimigli M, Sangiorgi GM, Golia B,
Ricciardelli B, Condorelli G. Renal Insufficiency After Contrast Media
Administration Trial II (REMEDIAL II): RenalGuard System in high-risk patients
for contrast-induced acute kidney injury. *Circulation* 2011;**124**:1260–1269.

72.
Putzu
A, Boscolo Berto M, Belletti A, Pasotti E, Cassina T, Moccetti T, Pedrazzini G.
Prevention of contrast-induced acute kidney injury by furosemide with matched
hydration in patients undergoing interventional procedures: A systematic review
and meta-analysis of randomized trials. *JACC Cardiovasc Interv* 2017;**10** 355–363.

73.
Subramaniam
RM, Suarez-Cuervo C, Wilson RF, Turban S, Zhang A, Sherrod C, Aboagye J, Eng J,
Choi MJ, Hutfless S, Bass EB. Effectiveness of prevention strategies for
contrast-induced nephropathy: A systematic review and meta-analysis. *Ann
Intern Med* 2016;**164**:406–416.

74.
Thompson
K, Razi R, Lee MS, Shen A, Stone GW, Hiremath S, Mehran
R, Brar SS. Statin use prior to angiography for the prevention of
contrast-induced acute kidney injury: A meta-analysis of 19 randomised trials. *EuroIntervention*
2016;**12**:366–374.

75.
Weisbord
SD, Gallagher M, Jneid H, Garcia S, Cass A, Thwin SS, Conner TA, Chertow GM,
Bhatt DL, Shunk K, Parikh CR, McFalls EO, Brophy M, Ferguson R, Wu H,
Androsenko M, Myles J, Kaufman J, Palevsky PM; PRESERVE Trial Group. Outcomes after angiography with sodium bicarbonate and
acetylcysteine. *N Engl J Med* 2018;**378**:603–614.

76.
Lancellotti
P, Tribouilloy C, Hagendorff A, Popescu BA, Edvardsen T, Pierard LA, Badano L,
Zamorano JL; Scientific Document Committee of the European Association of
Cardiovascular Imaging. Recommendations for the echocardiographic assessment of
native valvular regurgitation: An executive summary from the European
Association of Cardiovascular Imaging. *Eur Heart J Cardiovasc Imaging*
2013;**14**:611–644.

77.
Zoghbi
WA, Adams D, Bonow RO, Enriquez-Sarano M, Foster E, Grayburn PA, Hahn RT, Han
Y, Hung J, Lang RM, Little SH, Shah DJ, Shernan S, Thavendiranathan P, Thomas
JD, Weissman NJ. Recommendations for noninvasive evaluation of native valvular
regurgitation: A report from the American Society of Echocardiography developed
in collaboration with the Society for Cardiovascular Magnetic Resonance. *J
Am Soc Echocardiogr* 2017;**30**:303–371.

78.
Baumgartner
H, Falk V, Bax JJ, De Bonis M, Hamm C, Holm PJ, Iung B, Lancellotti P, Lansac
E, Rodriguez Munoz D, Rosenhek R, Sjogren J, Tornos Mas P, Vahanian A, Walther
T, Wendler O, Windecker S, Zamorano JL; ESC Scientific Document Group. 2017
ESC/EACTS Guidelines for the management of valvular heart disease. *Eur Heart
J* 2017;**38**:2739–2791.

79.
Smith
PK, Michler RE, Woo YJ, Alexander JH, Puskas JD, Parides MK, Hahn RT, Williams
JB, Dent JM, Ferguson TB Jr, Moquete E, Rose EA, Page P, Jeffries NO, O'Gara PT,
Ascheim DD. Design, rationale, and initiation of the Surgical Interventions for
Moderate Ischemic Mitral Regurgitation Trial: A report from the Cardiothoracic
Surgical Trials Network. *J Thorac Cardiovasc Surg* 2012;**143**:111–117,
117 e1.

80.
Serruys
PW, Chevalier B, Sotomi Y, Cequier A, Carrie D, Piek JJ, Van Boven AJ, Dominici
M, Dudek D, McClean D, Helqvist S, Haude M, Reith S, de Sousa Almeida M, Campo
G, Iniguez A, Sabate M, Windecker S, Onuma Y. Comparison of an
everolimus-eluting bioresorbable scaffold with an everolimus-eluting metallic
stent for the treatment of coronary artery stenosis (ABSORB II): A 3 year,
randomised, controlled, single-blind, multicentre clinical trial. *Lancet*
2016;**388**:2479–2491.

81.
Onuma
Y, Sotomi Y, Shiomi H, Ozaki Y, Namiki A, Yasuda S, Ueno T, Ando K, Furuya J,
Igarashi K, Kozuma K, Tanabe K, Kusano H, Rapoza R, Popma JJ, Stone GW,
Simonton C, Serruys PW, Kimura T. Two-year clinical, angiographic, and serial
optical coherence tomographic follow-up after implantation of an everolimus-eluting
bioresorbable scaffold and an everolimus-eluting metallic stent: Insights from
the randomised ABSORB Japan trial. *EuroIntervention* 2016;**12**:1090–1101.

82.
Wykrzykowska
JJ, Kraak RP, Hofma SH, van der Schaaf RJ, Arkenbout EK, AJ IJ, Elias J, van
Dongen IM, Tijssen RYG, Koch KT, Baan J Jr, Vis MM, de Winter RJ, Piek JJ,
Tijssen JGP, Henriques JPS; AIDA Investigators. Bioresorbable scaffolds versus
metallic stents in routine PCI. *N Engl J Med* 2017;**376**:2319–2328.

83.
Ali
ZA, Serruys PW, Kimura T, Gao R, Ellis SG, Kereiakes DJ, Onuma Y, Simonton C,
Zhang Z, Stone GW. 2-year outcomes with the Absorb bioresorbable scaffold for
treatment of coronary artery disease: A systematic review and meta-analysis of
seven randomised trials with an individual patient data substudy. *Lancet*
2017;**390**:760–772.

84.
Cassese
S, Byrne RA, Juni P, Wykrzykowska JJ, Puricel S, Ndrepepa G, Schunkert H,
Fusaro M, Cook S, Kimura T, Henriques JPS, Serruys PW, Windecker S, Kastrati A.
Mid-term clinical outcomes with everolimus-eluting bioresorbable scaffolds
versus everolimus-eluting metallic stents for percutaneous coronary
interventions: A meta-analysis of randomized trials. *EuroIntervention*
2018;**13**:1565–1573.

85.
Sorrentino
S, Giustino G, Mehran R, Kini AS, Sharma SK, Faggioni M, Farhan S, Vogel B,
Indolfi C, Dangas GD. Everolimus-eluting bioresorbable scaffolds versus
everolimus-eluting metallic stents. *J Am Coll Cardiol* 2017;**69**:3055–3066.

86.
Montone
RA, Niccoli G, De Marco F, Minelli S, D'Ascenzo F, Testa L, Bedogni F, Crea F.
Temporal trends in adverse events after everolimus-eluting bioresorbable
vascular scaffold versus everolimus-eluting metallic stent implantation: A
meta-analysis of randomized controlled trials. *Circulation* 2017;**135**:2145– 2154.

87.
Wiviott
SD, Trenk D, Frelinger AL, O'Donoghue M, Neumann FJ, Michelson AD, Angiolillo
DJ, Hod H, Montalescot G, Miller DL, Jakubowski JA, Cairns R, Murphy SA, McCabe
CH, Antman EM, Braunwald E; PRINCIPLE-TIMI 44 Investigators. Prasugrel compared
with high loading- and maintenance-dose clopidogrel in patients with planned
percutaneous coronary intervention: The Prasugrel in Comparison to Clopidogrel
for Inhibition of Platelet Activation and Aggregation-Thrombolysis in
Myocardial Infarction 44 trial. *Circulation* 2007;**116**:2923–2932.

88.
Wiviott
SD, Braunwald E, McCabe CH, Montalescot G, Ruzyllo W, Gottlieb S, Neumann FJ,
Ardissino D, De Servi S, Murphy SA, Riesmeyer J, Weerakkody G, Gibson CM,
Antman EM. Prasugrel versus clopidogrel in patients with
acute coronary syndromes. *N Engl J Med* 2007;**357**:2001–2015.

89.
De
Servi S, Goedicke J, Schirmer A, Widimsky P. Clinical outcomes for prasugrel
versus clopidogrel in patients with unstable angina or non-ST-elevation
myocardial infarction: An analysis from the TRITON-TIMI 38 trial. *Eur Heart
J Acute Cardiovasc Care* 2014;**3**:363–372.

90.
Wiviott
SD, Braunwald E, Angiolillo DJ, Meisel S, Dalby AJ, Verheugt FW, Goodman SG, Corbalan
R, Purdy DA, Murphy SA, McCabe CH, Antman EM; TRITON-TIMI 38 Investigators.
Greater clinical benefit of more intensive oral antiplatelet therapy with
prasugrel in patients with diabetes mellitus in the trial to assess improvement
in therapeutic outcomes by optimizing platelet inhibition with
prasugrel-Thrombolysis in Myocardial Infarction 38. *Circulation* 2008;**118**:1626–1636.

91.
Erlinge
D, Ten Berg J, Foley D, Angiolillo DJ, Wagner H, Brown PB, Zhou C, Luo J,
Jakubowski JA, Moser B, Small DS, Bergmeijer T, James S, Winters KJ. Reduction
in platelet reactivity with prasugrel 5 mg in low-body-weight patients is
noninferior to prasugrel 10 mg in higher-body-weight patients: Results from *the
FEATHER trial. J Am Coll Cardiol* 2012;**60**:2032–2040.

92.
Montalescot
G, Wiviott SD, Braunwald E, Murphy SA, Gibson CM, McCabe CH, Antman EM;
TRITON-TIMI 38 Investigators. Prasugrel compared with clopidogrel in patients
undergoing percutaneous coronary intervention for ST-elevation myocardial
infarction (TRITON-TIMI 38): Double-blind, randomised controlled trial. *Lancet*
2009;**373**:723–731.

93.
Wallentin
L, Becker RC, Budaj A, Cannon CP, Emanuelsson H, Held C, Horrow J, Husted S,
James S, Katus H, Mahaffey KW, Scirica BM, Skene A, Steg PG, Storey RF,
Harrington RA, Freij A, Thorsen M. Ticagrelor versus clopidogrel in patients
with acute coronary syndromes. *N Engl J Med* 2009;**361**:1045–1057.

94.
Lindholm
D, Varenhorst C, Cannon CP, Harrington RA, Himmelmann A, Maya J, Husted S, Steg
PG, Cornel JH, Storey RF, Stevens SR, Wallentin L, James SK. Ticagrelor vs.
clopidogrel in patients with non-ST-elevation acute coronary syndrome with or
without revascularization: Results from the PLATO trial. *Eur Heart J*
2014;**35**:2083–2093.

95.
Bonaca
MP, Bhatt DL, Cohen M, Steg PG, Storey RF, Jensen EC, Magnani G, Bansilal S,
Fish MP, Im K, Bengtsson O, Oude Ophuis T, Budaj A, Theroux P, Ruda M, Hamm C,
Goto S, Spinar J, Nicolau JC, Kiss RG, Murphy SA, Wiviott SD, Held P, Braunwald
E, Sabatine MS; PEGASUS-TIMI 54 Steering Committee and Investigators. Long-term use of ticagrelor in patients with prior myocardial
infarction. *N Engl J Med* 2015;**372**:1791–1800.

96.
Schulz
S, Angiolillo DJ, Antoniucci D, Bernlochner I, Hamm C, Jaitner J, Laugwitz KL,
Mayer K, von Merzljak B, Morath T, Neumann FJ, Richardt G, Ruf J, Schomig G,
Schuhlen H, Schunkert H, Kastrati A; Intracoronary Stenting and Antithrombotic
Regimen: Rapid Early Action for Coronary Treatment (ISAR-REACT) 5 Trial
Investigators. Randomized comparison of ticagrelor versus prasugrel in patients
with acute coronary syndrome and planned invasive strategy-design and rationale
of the Intracoronary Stenting and Antithrombotic Regimen: Rapid Early Action
for Coronary Treatment (ISAR-REACT) 5 trial. *J Cardiovasc Transl Res*
2014;**7**:91–100.

97.
Steg
PG, James S, Harrington RA, Ardissino D, Becker RC, Cannon CP, Emanuelsson H,
Finkelstein A HS, Katus H, Kilhamn J, Olofsson S, Storey RF, Weaver WD,
Wallentin L; PLATO Study Group. Ticagrelor versus clopidogrel in patients with
ST-elevation acute coronary syndromes intended for reperfusion with primary
percutaneous coronary intervention: A Platelet Inhibition and Patient Outcomes
(PLATO) trial subgroup analysis. *Circulation* 2010;**122**:2131–2141.

98.
Bellemain-Appaix
A, Brieger D, Beygui F, Silvain J, Pena A, Cayla G, Barthélémy O, Collet JP,
Montalescot G. New P2Y12 inhibitors versus clopidogrel in percutaneous coronary
intervention: A meta-analysis. *J Am Coll Cardiol* 2010;**56**:1542–1551.

99.
Stone
GW, McLaurin BT, Cox DA, Bertrand ME, Lincoff AM, Moses JW, White HD, Pocock
SJ, Ware JH, Feit F, Colombo A, Aylward PE, Cequier AR, Darius H, Desmet W,
Ebrahimi R, Hamon M, Rasmussen LH, Rupprecht HJ, Hoekstra J, Mehran R, Ohman
EM; ACUITY Investigators. Bivalirudin for patients with acute
coronary syndromes. *N Engl J Med* 2006;**355**:2203–2216.

100.
Kastrati
A, Neumann F-J, Schulz S, Massberg S, Byrne RA, Ferenc M, Laugwitz K-L, Pache
J, Ott I, Hausleiter J, Seyfarth M, Gick M, Antoniucci D, Schömig A, Berger PB,
Mehilli J. Abciximab and heparin versus bivalirudin for non-ST-elevation
myocardial infarction. *N Engl J Med* 2011;**365**:1980–1989.

101.
Stone
GW, Witzenbichler B, Guagliumi G, Peruga JZ, Brodie BR, Dudek D, Kornowski R,
Hartmann F, Gersh BJ, Pocock SJ, Dangas G, Wong SC, Kirtane AJ, Parise H, Mehran
R; HORIZONS-AMI Trial Investigators. Bivalirudin during
primary PCI in acute myocardial infarction. *N Engl J Med* 2008;**358**:2218–2230.

102.
Steg
PG, van 't Hof A, Hamm CW, Clemmensen P, Lapostolle F, Coste P, Ten Berg J, Van
Grunsven P, Eggink GJ, Nibbe L, Zeymer U, Campo dell' Orto M, Nef H, Steinmetz
J, Soulat L, Huber K, Deliargyris EN, Bernstein D, Schuette D, Prats J, Clayton
T, Pocock S, Hamon M, Goldstein P; EUROMAX Investigators. Bivalirudin started
during emergency transport for primary PCI. *N Engl J Med* 2013;**369**:2207–2217.

103.
Shahzad
A, Kemp I, Mars C, Wilson K, Roome C, Cooper R, Andron M, Appleby C, Fisher M,
Khand A, Kunadian B, Mills JD, Morris JL, Morrison WL, Munir S, Palmer ND,
Perry RA, Ramsdale DR, Velavan P, Stables RH; HEAT-PPCI Trial Investigators.
Unfractionated heparin versus bivalirudin in primary percutaneous coronary
intervention (HEAT-PPCI): An open-label, single centre, randomised controlled
trial. *Lancet* 2014;**384**:1849–1858.

104.
Schulz
S, Richardt G, Laugwitz KL, Morath T, Neudecker J, Hoppmann P, Mehran R,
Gershlick AH, Tolg R, Anette Fiedler K, Abdel-Wahab M, Kufner S, Schneider S,
Schunkert H, Ibrahim T, Mehilli J, Kastrati A; Bavarian Reperfusion
Alternatives Evaluation Investigators. Prasugrel plus
bivalirudin vs. clopidogrel plus heparin in patients with ST-segment elevation
myocardial infarction. *Eur Heart J* 2014;**35**:2285–2294.

105.
Valgimigli
M, Frigoli E, Leonardi S, Rothenbuhler M, Gagnor A, Calabro P, Garducci S,
Rubartelli P, Briguori C, Ando G, Repetto A, Limbruno U, Garbo R, Sganzerla P,
Russo F, Lupi A, Cortese B, Ausiello A, Ierna S, Esposito G, Presbitero P,
Santarelli A, Sardella G, Varbella F, Tresoldi S, de Cesare N, Rigattieri S,
Zingarelli A, Tosi P, van 't Hof A, Boccuzzi G, Omerovic E, Sabate M, Heg D, Juni
P, Vranckx P, for the MATRIX Investigators. Bivalirudin or
unfractionated heparin in acute coronary syndromes. *N Engl J Med*
2015;**373**:997–1009.

106.
Erlinge
D, Omerovic E, Frobert O, Linder R, Danielewicz M, Hamid M, Swahn E, Henareh L,
Wagner H, Hardhammar P, Sjogren I, Stewart J, Grimfjard P, Jensen J, Aasa M,
Robertsson L, Lindroos P, Haupt J, Wikstrom H, Ulvenstam A, Bhiladvala P,
Lindvall B, Lundin A, Todt T, Ioanes D, Ramunddal T, Kellerth T, Zagozdzon L,
Gotberg M, Andersson J, Angeras O, Ostlund O, Lagerqvist B, Held C, Wallentin
L, Schersten F, Eriksson P, Koul S, James S. Bivalirudin versus heparin
monotherapy in myocardial infarction. *N Engl J Med* 2017;**377**:1132–1142.

107.
Nührenberg TG,
Hochholzer W, Mashayekhi K, Ferenc M, Neumann FJ. Efficacy and safety of
bivalirudin for percutaneous coronary intervention in acute coronary syndromes:
A meta-analysis of randomized-controlled trials. *Clin Res Cardiol*;doi: 10.1007/s00392-018-1251-1. Published
online ahead of print 13 April 2018.

108.
Moscucci
M, Fox KA, Cannon CP, Klein W, Lopez-Sendon J, Montalescot G, White K, Goldberg
RJ. Predictors of major bleeding in acute coronary syndromes: The Global
Registry of Acute Coronary Events (GRACE). *Eur Heart J* 2003;**24**:1815–1823.

109.
Latif
F, Kleiman NS, Cohen DJ, Pencina MJ, Yen CH, Cutlip DE, Moliterno DJ, Nassif D,
Lopez JJ, Saucedo JF; EVENT Investigators. In-hospital and 1-year outcomes
among percutaneous coronary intervention patients with chronic kidney disease
in the era of drug-eluting stents: A report from the EVENT (Evaluation of Drug
Eluting Stents and Ischemic Events) registry. *JACC Cardiovasc Interv*
2009;**2**:37–45.

110.
Mehran
R, Nikolsky E, Lansky AJ, Kirtane AJ, Kim YH, Feit F, Manoukian S, Moses JW,
Ebrahimi R, Ohman EM, White HD, Pocock SJ, Dangas GD, Stone GW. Impact of
chronic kidney disease on early (30-day) and late (1-year) outcomes of patients
with acute coronary syndromes treated with alternative antithrombotic treatment
strategies: An ACUITY (Acute Catheterization and Urgent Intervention Triage
strategY) substudy. *JACC Cardiovasc Interv* 2009;**2**:748–757.

111.
Alexander
KP, Chen AY, Roe MT, Newby LK, Gibson CM, Allen-LaPointe NM, Pollack C, Gibler
WB, Ohman EM, Peterson ED; CRUSADE Investigators. Excess
dosing of antiplatelet and antithrombin agents in the treatment of
non-ST-segment elevation acute coronary syndromes. *JAMA* 2005;**294**:3108–3116.

112.
Steg
PG, Huber K, Andreotti F, Arnesen H, Atar D, Badimon L, Bassand JP, De Caterina
R, Eikelboom JA, Gulba D, Hamon M, Helft G, Fox KA, Kristensen SD, Rao SV,
Verheugt FW, Widimsky P, Zeymer U, Collet JP. Bleeding in
acute coronary syndromes and percutaneous coronary interventions: Position
paper by the Working Group on Thrombosis of the European Society of Cardiology.
*Eur Heart J* 2011;**32**:1854–1864.

113.
Aradi
D, Kirtane A, Bonello L, Gurbel PA, Tantry US, Huber K, Freynhofer MK, ten Berg
J, Janssen P, Angiolillo DJ, Siller-Matula JM, Marcucci R, Patti G, Mangiacapra
F, Valgimigli M, Morel O, Palmerini T, Price MJ, Cuisset T, Kastrati A, Stone
GW, Sibbing D. Bleeding and stent thrombosis on P2Y12-inhibitors: Collaborative
analysis on the role of platelet reactivity for risk stratification after
percutaneous coronary intervention. *Eur Heart J* 2015;**36**:1762–1771.

114.
Stone
GW, Witzenbichler B, Weisz G, Rinaldi MJ, Neumann FJ, Metzger DC, Henry TD, Cox
DA, Duffy PL, Mazzaferri E, Gurbel PA, Xu K, Parise H, Kirtane AJ, Brodie BR,
Mehran R, Stuckey TD; ADAPT-DES Investigators. Platelet reactivity and clinical
outcomes after coronary artery implantation of drug-eluting stents (ADAPT-DES):
A prospective multicentre registry study. *Lancet* 2013;**382**:614–623.

115.
Price
MJ, Berger PB, Teirstein PS, Tanguay JF, Angiolillo DJ, Spriggs D, Puri S,
Robbins M, Garratt KN, Bertrand OF, Stillabower ME, Aragon JR, Kandzari DE,
Stinis CT, Lee MS, Manoukian SV, Cannon CP, Schork NJ, Topol EJ; GRAVITAS
Investigators. Standard- vs high-dose clopidogrel based on platelet function
testing after percutaneous coronary intervention: The GRAVITAS randomized
trial. *JAMA* 2011;**305**:1097–1105.

116.
Trenk
D, Stone GW, Gawaz M, Kastrati A, Angiolillo DJ, Muller U, Richardt G,
Jakubowski JA, Neumann FJ. A randomized trial of prasugrel versus clopidogrel
in patients with high platelet reactivity on clopidogrel after elective
percutaneous coronary intervention with implantation of drug-eluting stents:
Results of the TRIGGER-PCI (Testing Platelet Reactivity In
Patients Undergoing Elective Stent Placement on Clopidogrel to Guide
Alternative Therapy With Prasugrel) study. *J Am Coll Cardiol* 2012;**59**:2159–2164.

117.
Collet
JP, Cuisset T, Range G, Cayla G, Elhadad S, Pouillot C, Henry P, Motreff P,
Carrie D, Boueri Z, Belle L, Van Belle E, Rousseau H, Aubry P, Monsegu J,
Sabouret P, O'Connor SA, Abtan J, Kerneis M, Saint-Etienne C, Barthelemy O,
Beygui F, Silvain J, Vicaut E, Montalescot G; ARCTIC Investigators. Bedside monitoring to adjust antiplatelet therapy for coronary
stenting. *N Engl J Med* 2012;**367**:2100–2109.

118.
Cayla
G, Cuisset T, Silvain J, Leclercq F, Manzo-Silberman S, Saint-Etienne C,
Delarche N, Bellemain-Appaix A, Range G, El Mahmoud R, Carrie D, Belle L,
Souteyrand G, Aubry P, Sabouret P, du Fretay XH, Beygui F, Bonnet JL, Lattuca
B, Pouillot C, Varenne O, Boueri Z, Van Belle E, Henry P, Motreff P, Elhadad S,
Salem JE, Abtan J, Rousseau H, Collet JP, Vicaut E, Montalescot G; ANTARCTIC
Investigators. Platelet function monitoring to adjust antiplatelet therapy in
elderly patients stented for an acute coronary syndrome (ANTARCTIC): An
open-label, blinded-endpoint, randomised controlled superiority trial. *Lancet*
2016;**388**:2015–2022.

119.
Sibbing
D, Aradi D, Jacobshagen C, Gross L, Trenk D, Geisler T, Orban M, Hadamitzky M,
Merkely B, Kiss RG, Komocsi A, Dezsi CA, Holdt L, Felix SB, Parma R,
Klopotowski M, Schwinger RHG, Rieber J, Huber K, Neumann FJ, Koltowski L,
Mehilli J, Huczek Z, Massberg S; TROPICAL-ACS Investigators. Guided
de-escalation of antiplatelet treatment in patients with acute coronary
syndrome undergoing percutaneous coronary intervention (TROPICAL-ACS): A
randomised, open-label, multicentre trial. *Lancet* 2017;**390**:1747–1757.

120.
Mega
JL, Simon T, Collet JP, Anderson JL, Antman EM, Bliden K, Cannon CP, Danchin N,
Giusti B, Gurbel P, Horne BD, Hulot JS, Kastrati A, Montalescot G, Neumann FJ,
Shen L, Sibbing D, Steg PG, Trenk D, Wiviott SD, Sabatine MS. Reduced-function
CYP2C19 genotype and risk of adverse clinical outcomes among patients treated
with clopidogrel predominantly for PCI: A meta-analysis. *JAMA* 2010;**304**:1821–1830.

121.
Roberts
JD, Wells GA, Le May MR, Labinaz M, Glover C, Froeschl M, Dick A, Marquis JF,
O'Brien E, Goncalves S, Druce I, Stewart A, Gollob MH, So DY. Point-of-care
genetic testing for personalisation of antiplatelet treatment (RAPID GENE): A
prospective, randomised, proof-of-concept trial. *Lancet* 2012;**379**:1705–1711.

122.
Collet
JP, Kerneis M, Hulot JS, O'Connor SA, Silvain J, Mansencal N, Brugier D, Abtan J,
Barthelemy O, Vignalou JB, Payot L, Rousseau H, Vicaut E, Montalescot G; GAMMA
Investigators. Point-of-care genetic profiling and/or
platelet function testing in acute coronary syndrome. *Thromb Haemost*
2016;**115**: 382–391.
